# Supplementary material for: Transition metal and base free synthesis of 2-aryl-2-oxazolines from aldehydes and β-amino alcohols catalysed by potassium iodide
Source: Royal Society of Chemistry journal article supplement (doi:10.1039/c4ra08578g), 2014-01-01
Supplement: c4ra08578g1.pdf [file c4ra08578g1.pdf]

## Electronic Supplemental Information (ESI)

### Transition metal and base free synthesis of 2-aryl-2-oxazolines from aldehydes with $\beta$ -amino alcohols catalyzed by Potassium Iodide

C. Uma Maheswari,<sup>1\*</sup> G. Sathish Kumar<sup>2</sup> and M. Venkateshwar<sup>2</sup>

<sup>1</sup> Department of Chemistry, Center for Nanotechnology and advanced Biomaterials (CeNTAB), School of Chemical and Biotechnology, SASTRA University, Thanjavur-613401, India

<sup>2</sup> Inorganic and Physical Chemistry Division, Indian Institute of Chemical Technology, Tarnaka, Hyderabad 500607, India.

Tel.: +91 - (4362) 304346; Fax: +91-(4362)-264111.

E-mail: [umamaheswaric@scbt.sastra.edu](mailto:umamaheswaric@scbt.sastra.edu); [uma.cchem@gmail.com](mailto:uma.cchem@gmail.com)

#### Table of contents

|                                                                                                                      |    |
|----------------------------------------------------------------------------------------------------------------------|----|
| 1. General information.....                                                                                          | 2  |
| 2. Experimental section.....                                                                                         | 2  |
| 3. Spectroscopic data of products and Copies of <sup>1</sup> H NMR, <sup>13</sup> C NMR and GC-MS for Products ..... | 4  |
| 4. References .....                                                                                                  | 34 |

## General Information

All chemicals were purchased from Sigma-Aldrich and S.D Fine Chemicals, Pvt. Ltd. India and used as received. ACME silica gel (100–200 mesh) was used for column chromatography and thin-layer chromatography was performed on Merck-precoated silica gel 60-F<sub>254</sub> plates. All the other chemicals and solvents were obtained from commercial sources and purified using standard methods. The <sup>1</sup>H spectra were recorded on a Varian-Gemini 200 MHz, Bruker-Avance 300 MHz Spectrometer. Chemical shifts ( $\delta$ ) are reported in ppm, using TMS ( $\delta = 0$ ) as an internal standard in CDCl<sub>3</sub>. GC were recorded on Shimadzu-2014 using BP-01 (30M X 0.25 mm X 1.0  $\mu$ m) column. GC-MS spectra were recorded on Thermo Trace DSQ GC-MS spectrometer using BP-01 (30M X 0.25 mm X 1.0  $\mu$ m) column.

**Typical experimental procedure for synthesis of 2-oxazoline from aldehyde and amino alcohol:** To a solution of aldehyde (1.0 mmol), potassium iodide (0.2 mmol) and amino-alcohol (1.2 mmol) in 3 mL of CH<sub>2</sub>Cl<sub>2</sub>, a solution of 70% aqueous TBHP (3.0 mmol) was added dropwise over a period of 30 min and stirred at room temperature. The mixture was quenched with saturated aqueous Na<sub>2</sub>S<sub>2</sub>O<sub>3</sub> after 8h, washed with brine, extracted with ethyl acetate and dried over anhydrous Na<sub>2</sub>SO<sub>4</sub>. Removal of the solvent under vacuum afforded the crude product, which was further purified by column chromatography using hexane / ethyl acetate mixture and was analyzed by <sup>1</sup>H NMR, GC and GC-MS. Similar procedure was followed for the synthesis of chiral oxazolines from chiral amino alcohols and benzaldehyde and multi-scale synthesis of chiral 2-Oxazoline **2p**.

Products 3a [1], 3c [2], 3d [3], 3h [4], 3k [5], 3m [6], 3n [7], 3p [6], 3q [8], 3r [8] and 3t [9] have been described in the literature previously. Characterization data for all compounds are given below.

**5-methyl-2-p-tolyl-4,5-dihydrooxazole (3a, Table 2, Entry 1) [1]**

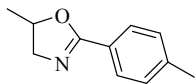

Isolated yield = 61%;  $^1\text{H NMR}$   $\delta$  (300 MHz,  $\text{CDCl}_3$ ) 7.80 (d,  $J = 7.9$  Hz, Ar, 2H), 7.18 (d,  $J = 7.9$  Hz, Ar, 2H), 4.77 – 4.87 (m, 1H), 4.11 (dd,  $J = 9.3$  Hz, 9.2 Hz, 1H), 3.57 (dd,  $J = 7.4$  Hz, 7.2 Hz), 2.4 (s,  $-\text{CH}_3$ , 3H), 1.43 (d,  $J = 6.0$  Hz,  $-\text{CH}_3$ , 3H). **GC-MS**  $m/z$  175.1 ( $\text{M}^+$  peak), 130.9, 91.0, 65.0 .

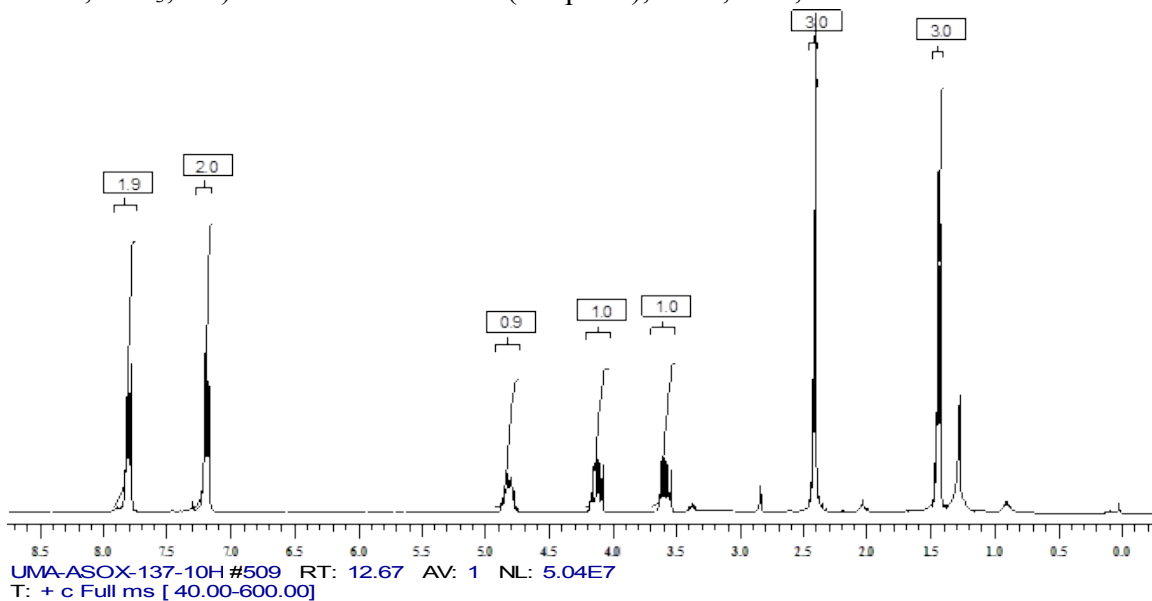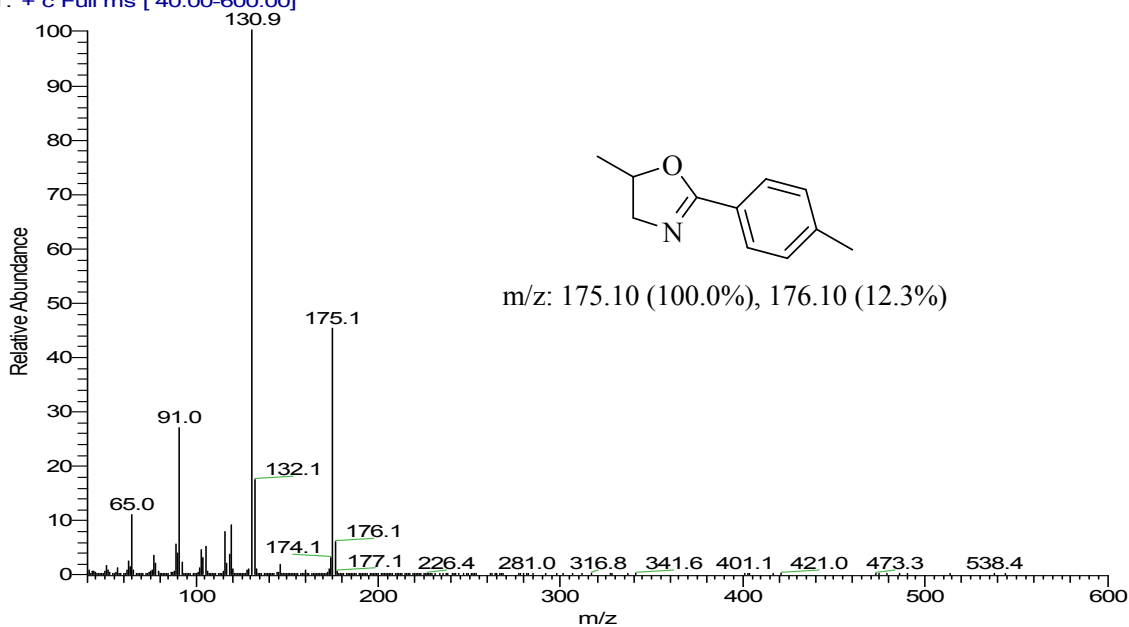

**5-methyl-2-(4-nitrophenyl)-4,5-dihydrooxazole (3b, Table 2, Entry 2 )**

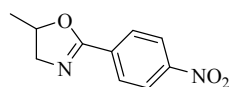

Isolated yield = 96%; yellow solid; mp 122-124 °C. IR (KBr)  $\text{cm}^{-1}$ : 2927, 2877, 1726, 1647, 1597, 1525, 1343, 1111, 957, 850, 705.  $^1\text{H NMR}$   $\delta$  (300 MHz,  $\text{CDCl}_3$ ) 8.29 (d,  $J = 9.1$  Hz, Ar, 2H), 8.12 (d,  $J = 8.9$  Hz, Ar, 2H), 4.86 – 4.98 (m, 1H), 4.21 (dd,  $J = 9.4$  Hz, 9.2 Hz, 1H), 3.67 (dd,  $J = 7.5$  Hz, 7.5 Hz), 1.50 (d,  $J = 6.2$  Hz,  $-\text{CH}_3$ , 3H).  $^{13}\text{C NMR}$  (75 MHz,  $\text{CDCl}_3$ ): 162.0, 133.8, 129.0, 123.4, 61.8, 31.8, 29.6, 20.9. **GC-MS**  $m/z$  206.1 ( $\text{M}^+$  peak), 162.0, 117.1, 116.0, 89.0, 76.0 .

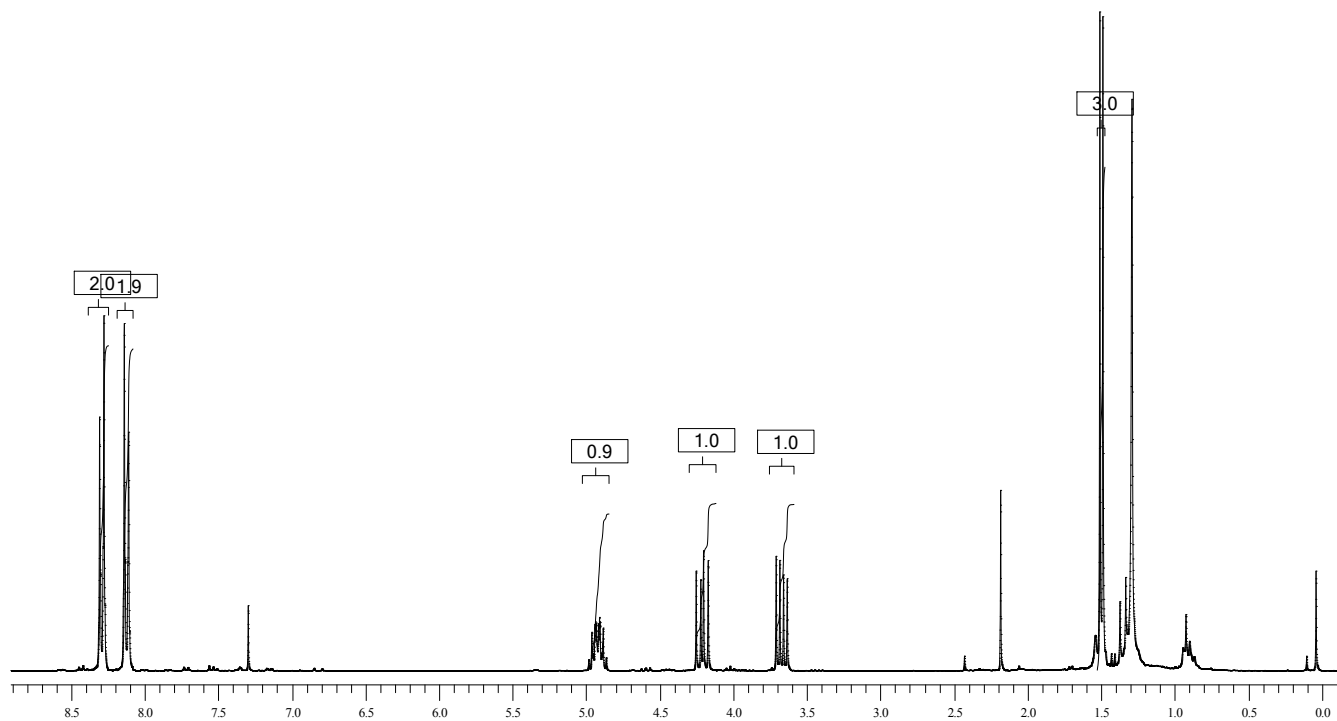

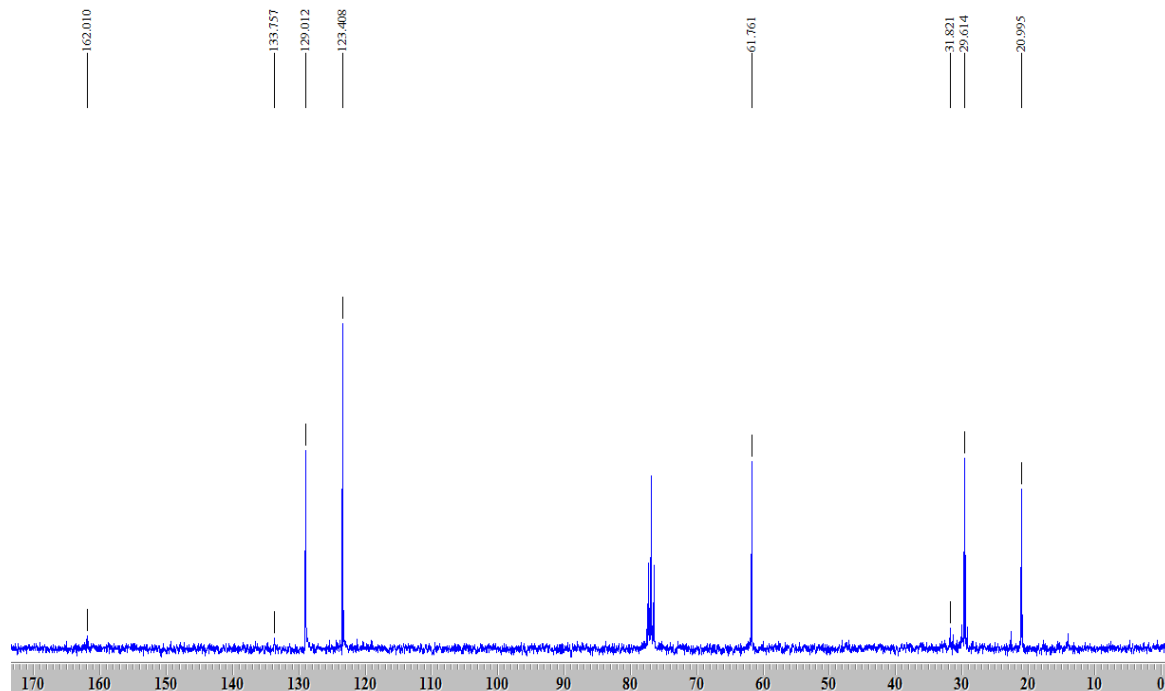

UMA-ASOX-133-5H #678 RT: 15.89 AV: 1 NL: 3.65E7  
 T: + c Full ms [ 40.00-600.00]

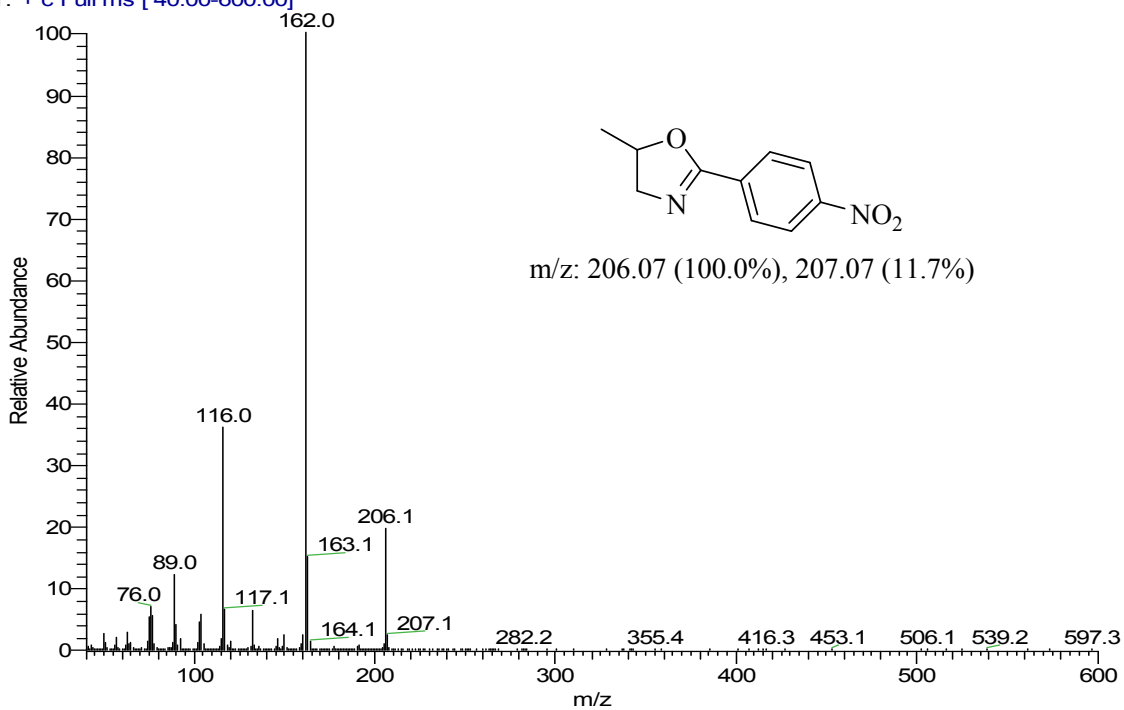

**2-(4-chlorophenyl)-5-methyl-4,5-dihydrooxazole (3c, Table 2, Entry 3 ) [2]**

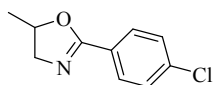

Isolated yield = 86%;  $^1\text{H NMR}$   $\delta$ (300 MHz,  $\text{CDCl}_3$ ) 7.86 (d,  $J = 8.5$  Hz, Ar, 2H), 7.37 (d,  $J = 8.5$  Hz, Ar, 2H), 4.77 – 4.89 (m, 1H), 4.12 (dd,  $J = 9.4$  Hz, 9.4 Hz, 1H), 3.58 (dd,  $J = 7.3$  Hz, 7.5 Hz), 1.43 (d,  $J = 6.2$  Hz,  $-\text{CH}_3$ , 3H).

**GC-MS**  $m/z$  195.0, 153.0, 150.9, 111.0, 89.0, 75.0 .

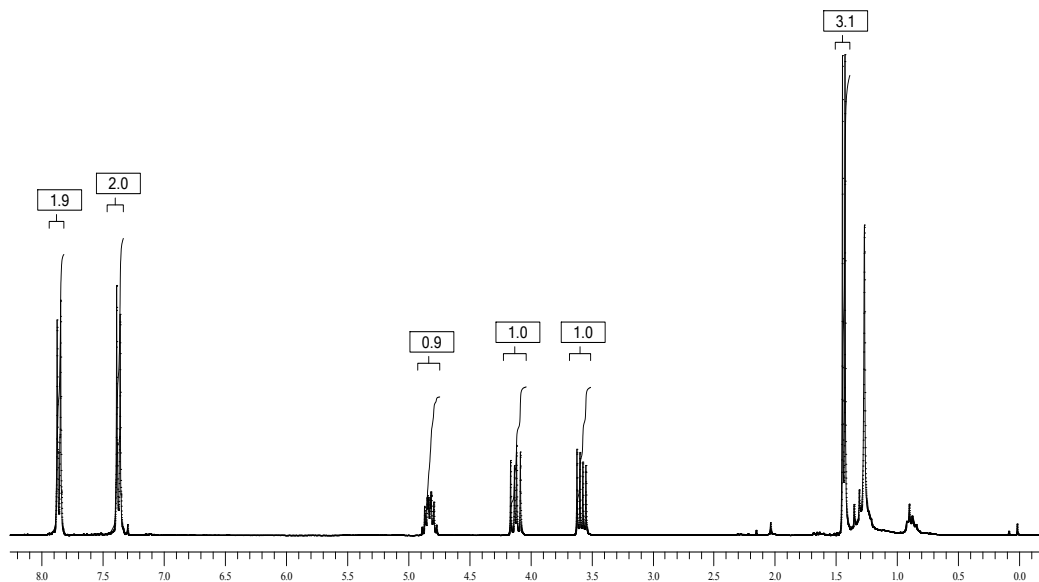

UMA-ASOX-135P #547 RT: 13.40 AV: 1 NL: 4.33E7  
T: + c Full ms [ 40.00-600.00]

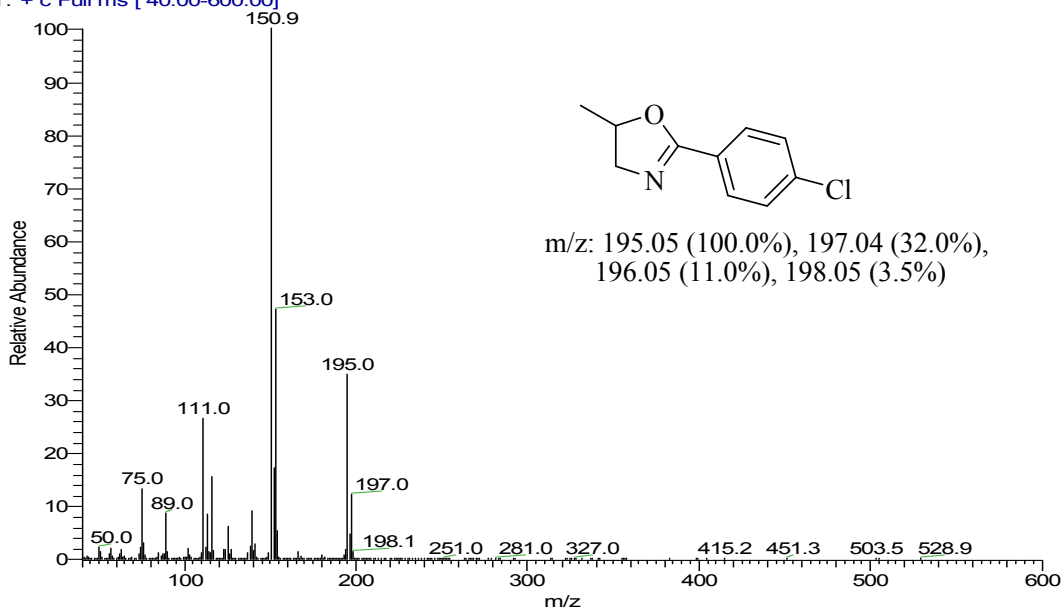

**5-methyl-2-phenyl-4,5-dihydrooxazole (3d, Table 2, Entry 4) [3]**

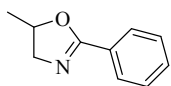

Isolated yield = 83%;  $^1\text{H NMR}$   $\delta$ (300 MHz,  $\text{CDCl}_3$ ) 7.86 (d,  $J = 8.5$  Hz, Ar, 2H), 7.54 (d,  $J = 8.2$  Hz, 1H), 7.37 (d,  $J = 8.5$  Hz, Ar, 2H), 4.70 – 4.85 (m, 1H), 4.05 (dd,  $J = 9.3$  Hz, 9.3 Hz, 1H), 3.52 (dd,  $J = 7.4$  Hz, 7.4 Hz), 1.37

(d,  $J = 6.1$  Hz,  $-\text{CH}_3$ , 3H). **GC-MS**  $m/z$  161.0, 117.0, 90.0, 77.0, 51.0 .

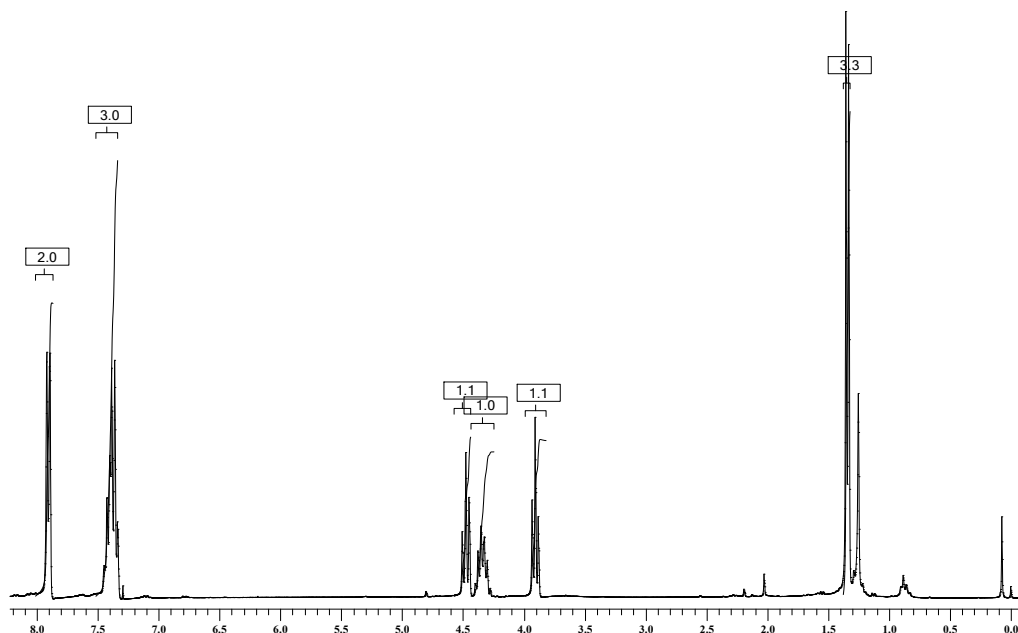

UMA-ASOX-131-8H #427 RT: 11.11 AV: 1 NL: 4.24E7  
T: + c Full ms [ 40.00-600.00]

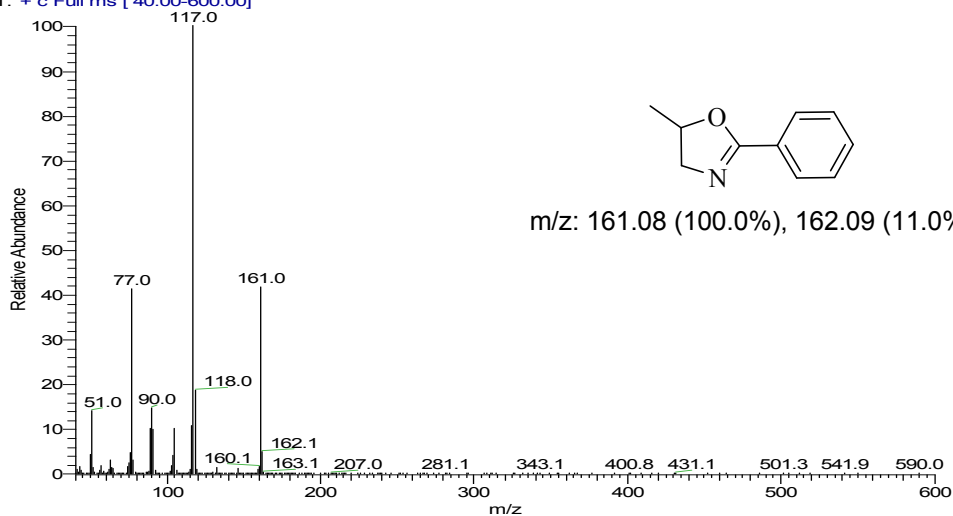

**5-methyl-2-(pyridin-3-yl)-4,5-dihydrooxazole (3e, Table 2, Entry 5)**

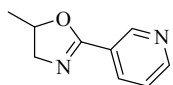

Isolated yield = 61%; yellow liquid; IR (KBr)  $\text{cm}^{-1}$ : 2924, 2854, 1730,

1652, 1458, 1377, 1278, 1114, 965, 811.  $^1\text{H}$  NMR  $\delta$ (300 MHz,  $\text{CDCl}_3$ ) 9.1

(s, Ar, 1H), 8.69 (s, Ar, 1H), 8.27 (d,  $J = 8.1$  Hz, Ar, 1H), 7.32 (d,  $J = 8.1$ , Ar, 1H), 4.90 – 4.72

(m, 1H), 4.11 (dd,  $J = 9.4$  Hz, 7.4 Hz, 1H), 3.58 (dd,  $J = 7.5$  Hz, 9.5 Hz), 1.39 (d,  $J = 6.3$  Hz, -

$\text{CH}_3$ , 3H).  $^{13}\text{C}$  NMR (75 MHz,  $\text{CDCl}_3$ ): 151.8, 149.3, 135.6, 124.9, 123.1, 74.2, 62.0, 29.6,

21.3. GC-MS  $m/z$  162.0, 117.9, 91.0, 78.0, 51.0 .

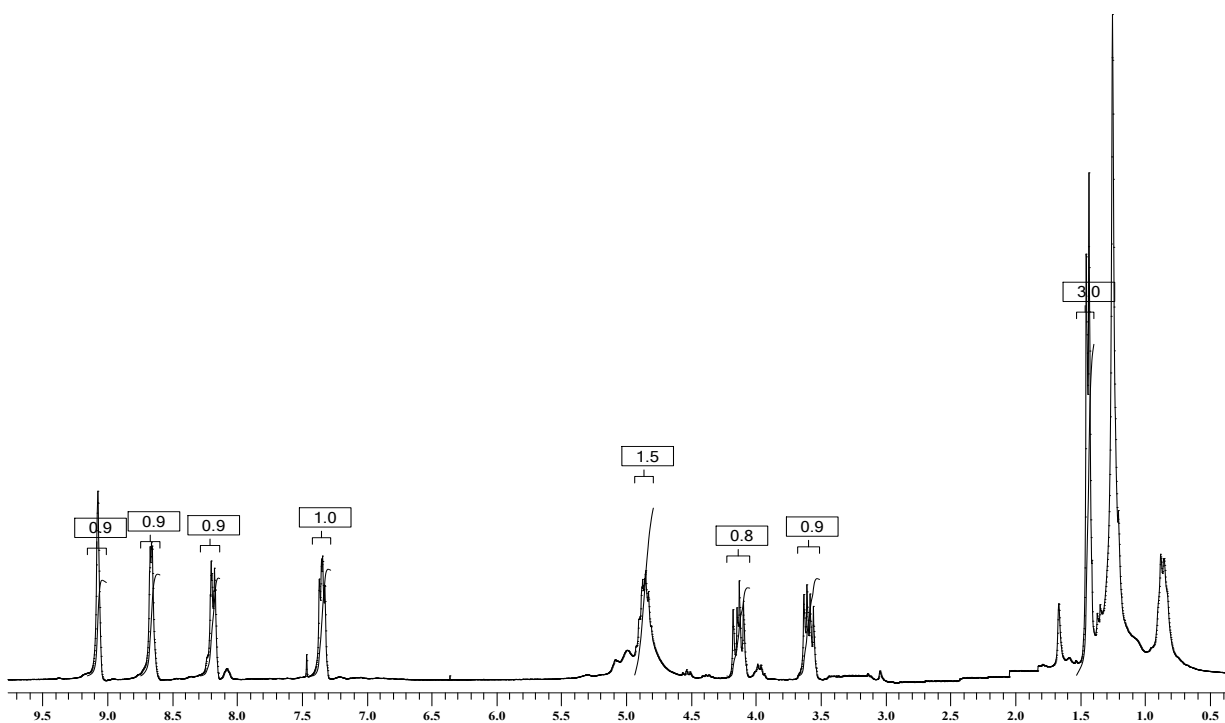



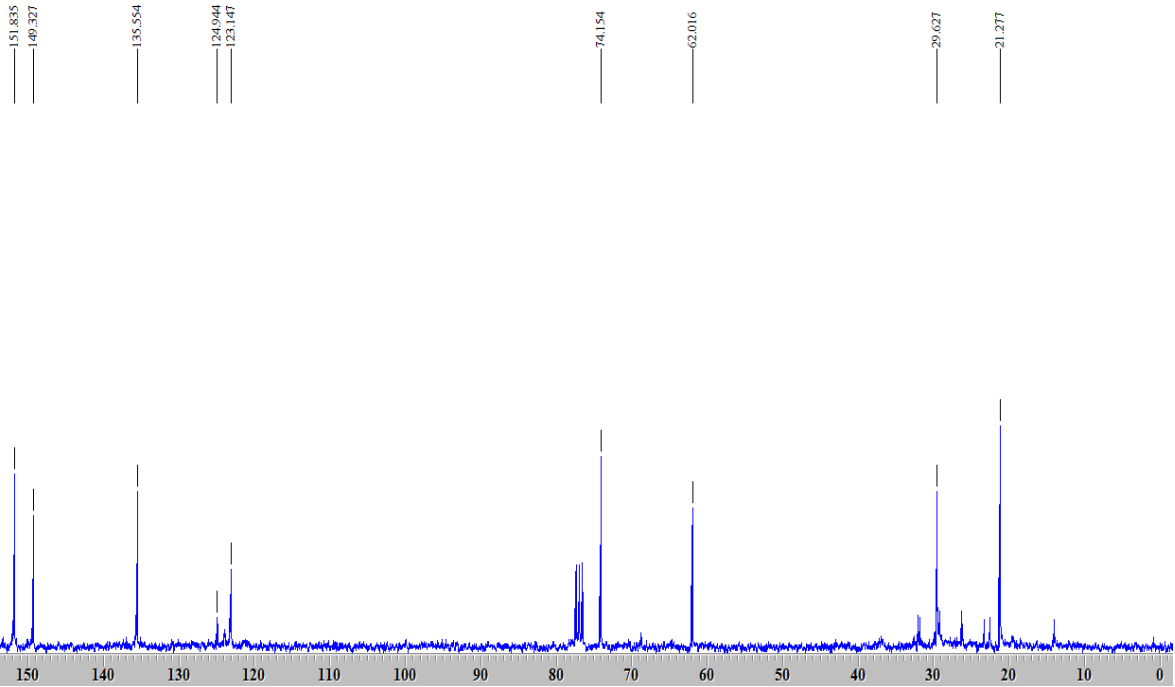

uma-asox-139-10h #467 RT: 11.87 AV: 1 NL: 4.25E7  
 T: + c Full ms [ 40.00-600.00]

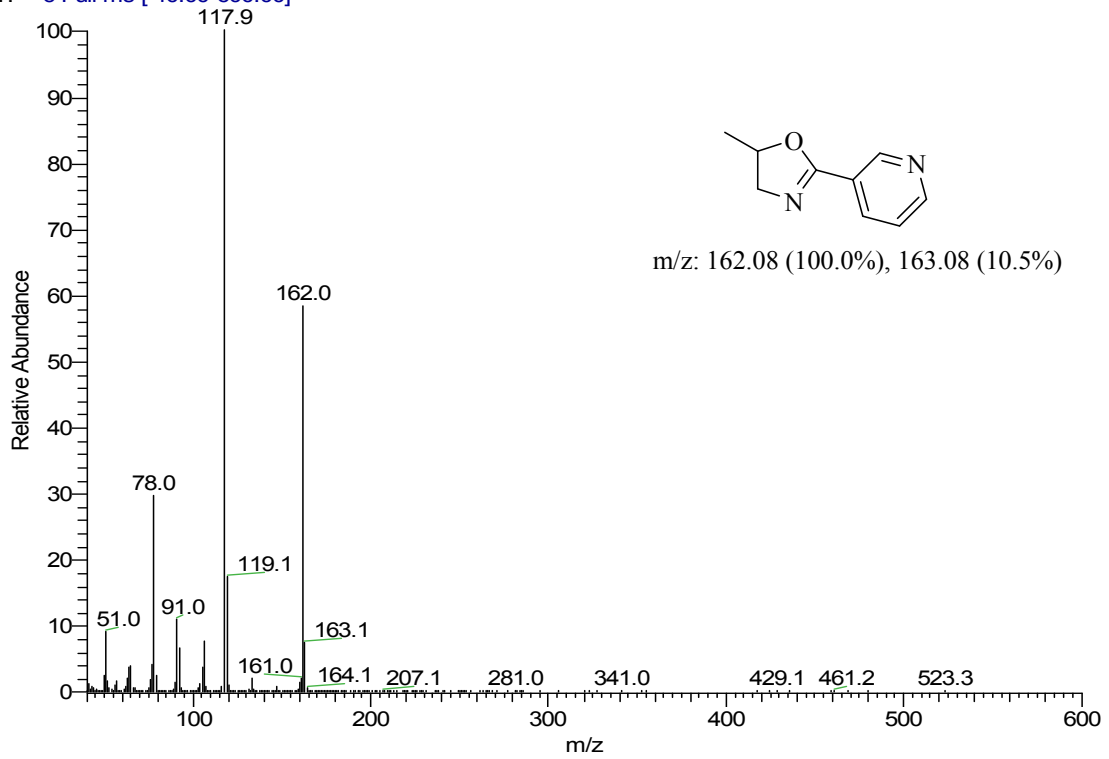

**4-methyl-2-p-tolyl-4,5-dihydrooxazole (3f, Table 2, Entry 6)**

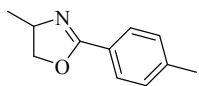

Isolated yield = 77%; yellow liquid; IR (KBr)  $\text{cm}^{-1}$ : 2956, 2923, 2855, 1724,

1647, 1457, 1350, 1264, 1178, 1108, 1062, 1021, 972, 829, 728.  $^1\text{H}$  NMR

$\delta$ (300 MHz,  $\text{CDCl}_3$ ) 7.81 (d,  $J = 7.9$  Hz, Ar, 2H), 7.20 (d,  $J = 7.9$  Hz, Ar, 2H), 4.51 (t,  $J = 9.0$  Hz,

8.1 Hz, 1H), 4.31- 4.43 (m, 1H), 3.94 (t,  $J = 7.5$  Hz, 7.7 Hz, 1H), 2.42(s,  $-\text{CH}_3$ , 3H), 1.38 (d,  $J =$

6.6  $-\text{CH}_3$ , 3H).  $^{13}\text{C}$  NMR (75 MHz,  $\text{CDCl}_3$ ): 151.8, 149.3, 135.6, 124.9, 123.1, 74.2, 62.0, 29.6,

21.3. GC-MS  $m/z$  175.1 ( $\text{M}^+$  peak), 160.0, 132.1, 105.0, 91.0, 65.0 .

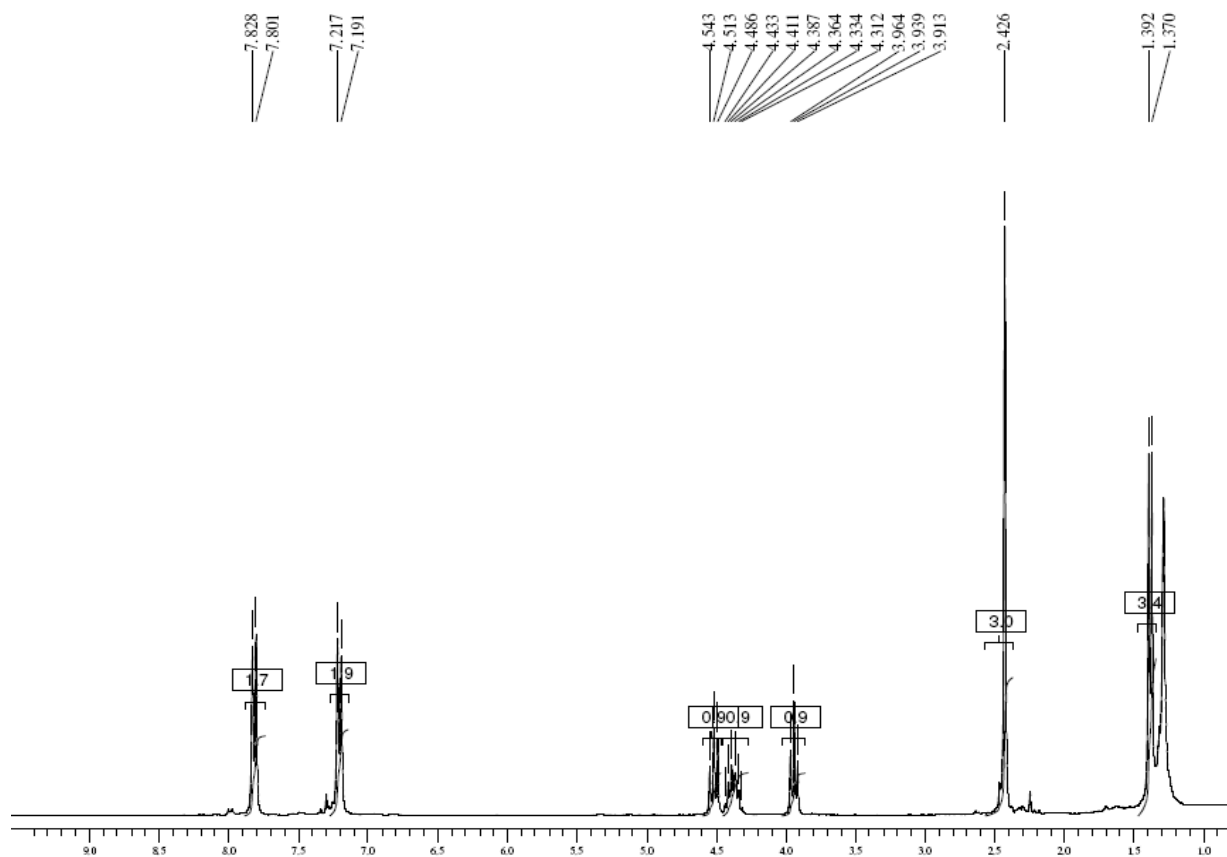

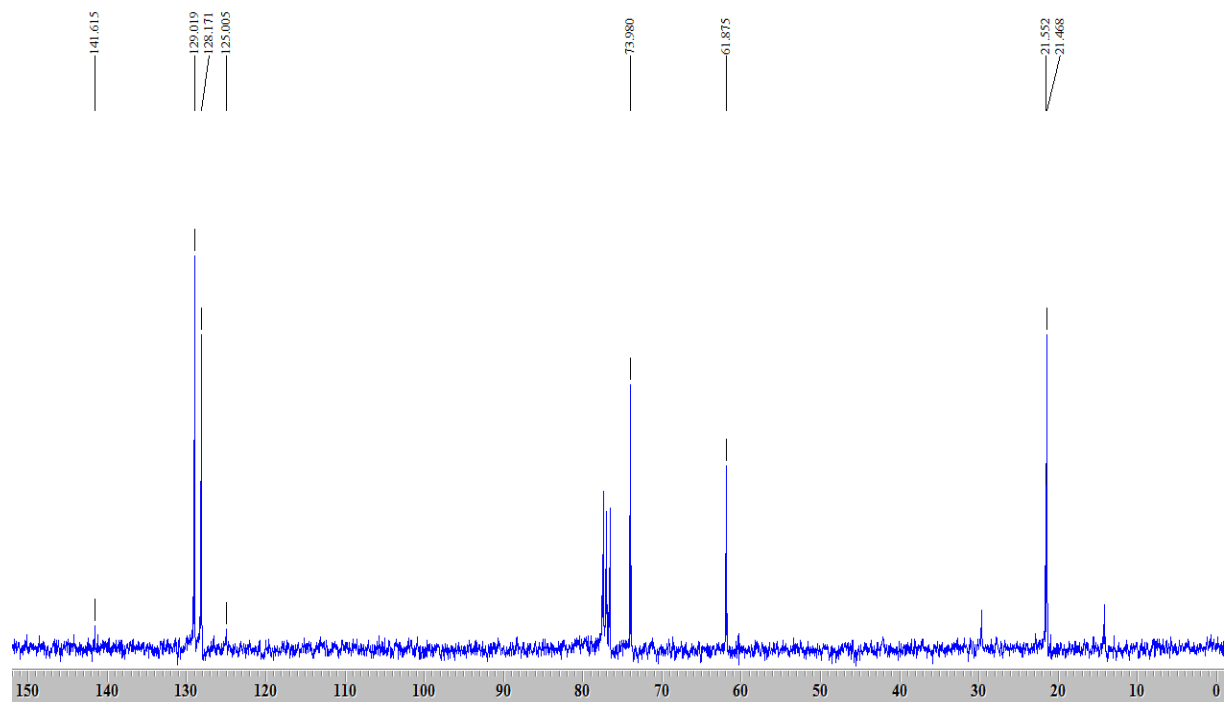

UMA-ASOX-124-1D #501 RT: 12.52 AV: 1 NL: 3.79E7  
 T: + c Full ms [ 40.00-600.00]

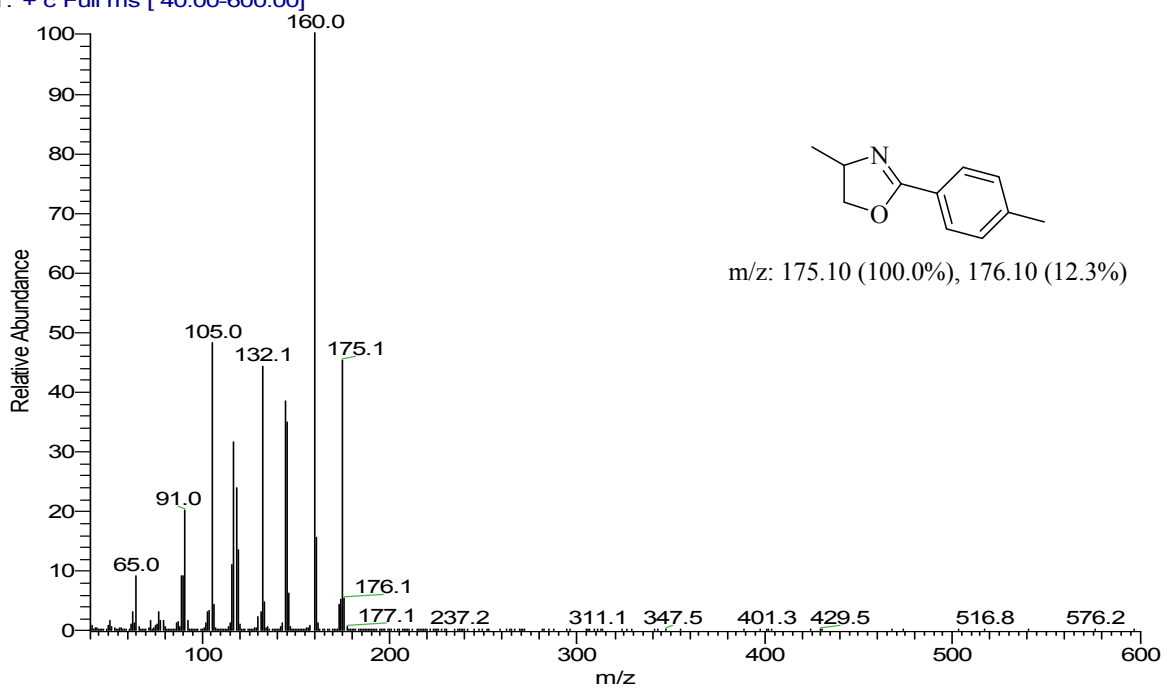

**4-methyl-2-(4-nitrophenyl)-4,5-dihydrooxazole (3g, Table 2, Entry 7)**

Isolated yield = 63%; pale yellow solid; mp 89-91 °C; IR (KBr)  $\text{cm}^{-1}$ : 2923,

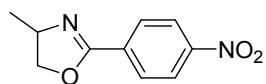

2855, 1645, 1522, 1344, 1069, 963, 856, 706.  $^1\text{H}$  NMR  $\delta$ (300 MHz,  $\text{CDCl}_3$ )

8.21 (d,  $J = 8.8$  Hz, Ar, 2H), 8.10 (d,  $J = 8.1$  Hz, Ar, 2H), 4.53 (t,  $J = 8.1$  Hz, 1H), 4.31- 4.37 (m,

1H), 3.94 (t,  $J = 7.8$  Hz, 1H), 1.42 (d,  $J = 6.7$ ,  $-\text{CH}_3$ , 3H).  $^{13}\text{C}$  NMR (75 MHz,  $\text{CDCl}_3$ ): 162.6,

137.4, 129.5, 128.6, 126.3, 74.2, 62.0, 21.4. GC-MS  $m/z$  206.0 ( $\text{M}^+$  peak ), 190.9, 176.0, 163.0,

130.0, 117.0, 103.0, 76.0.

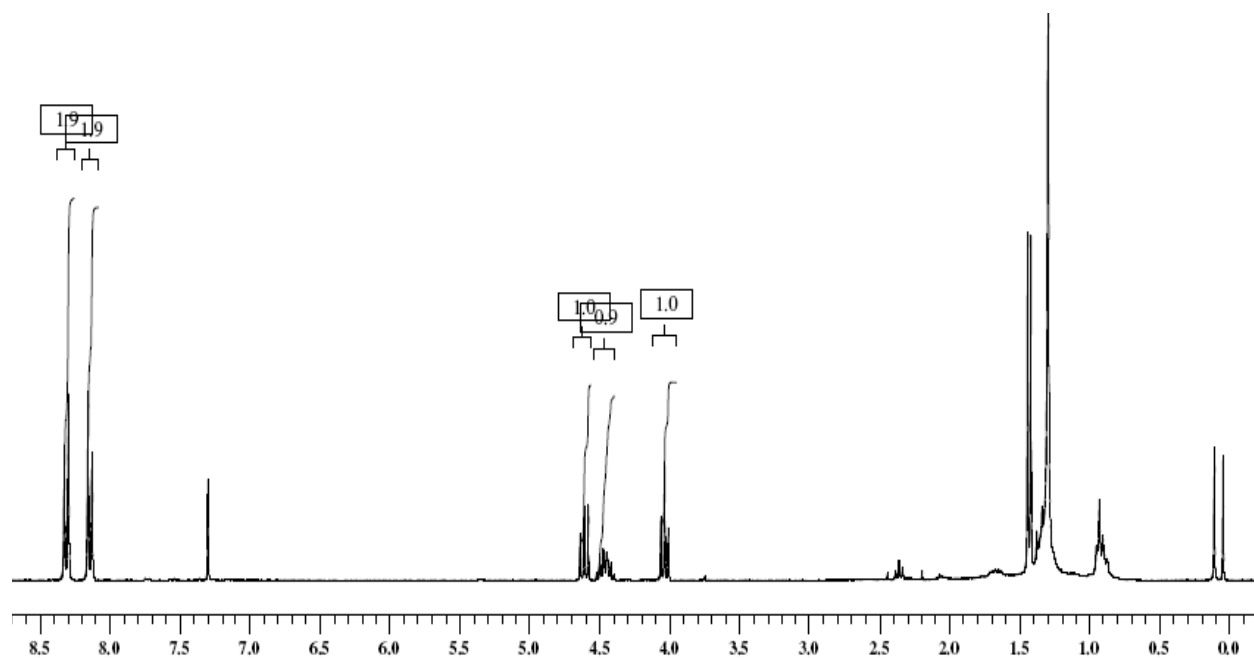

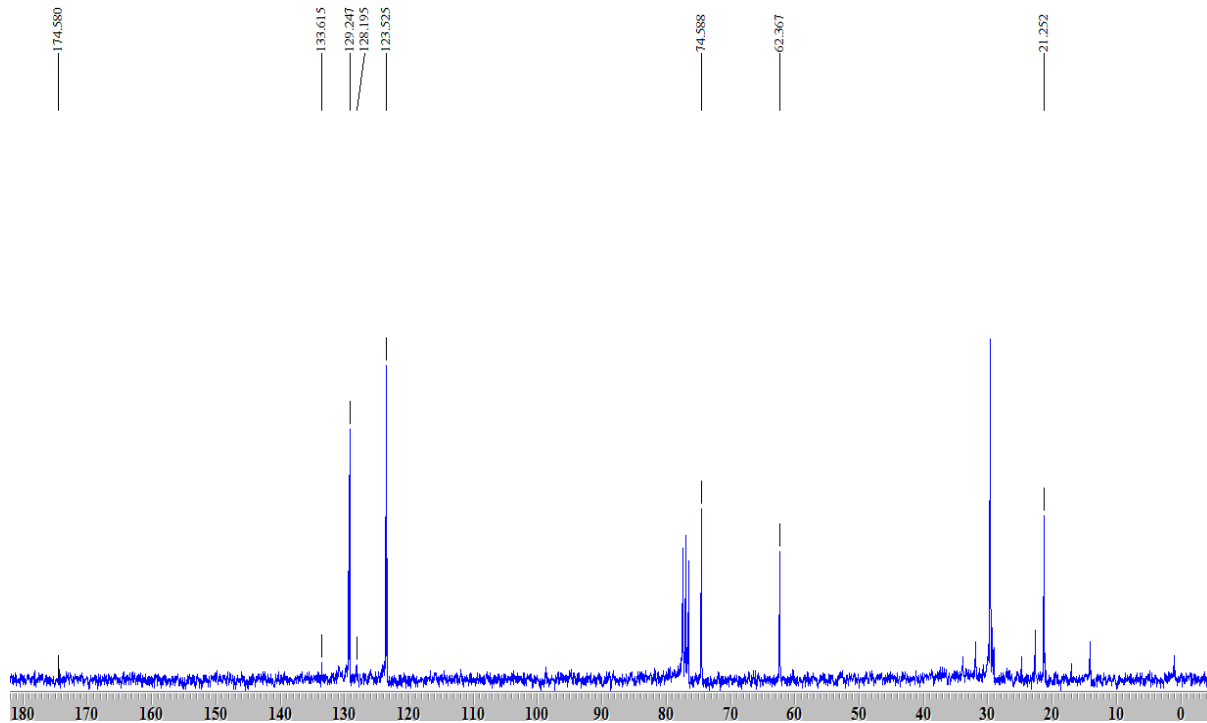

UMA-ASOX-121-6H #670 RT: 15.74 AV: 1 NL: 3.89E7  
 T: + c Full ms [ 40.00-600.00]

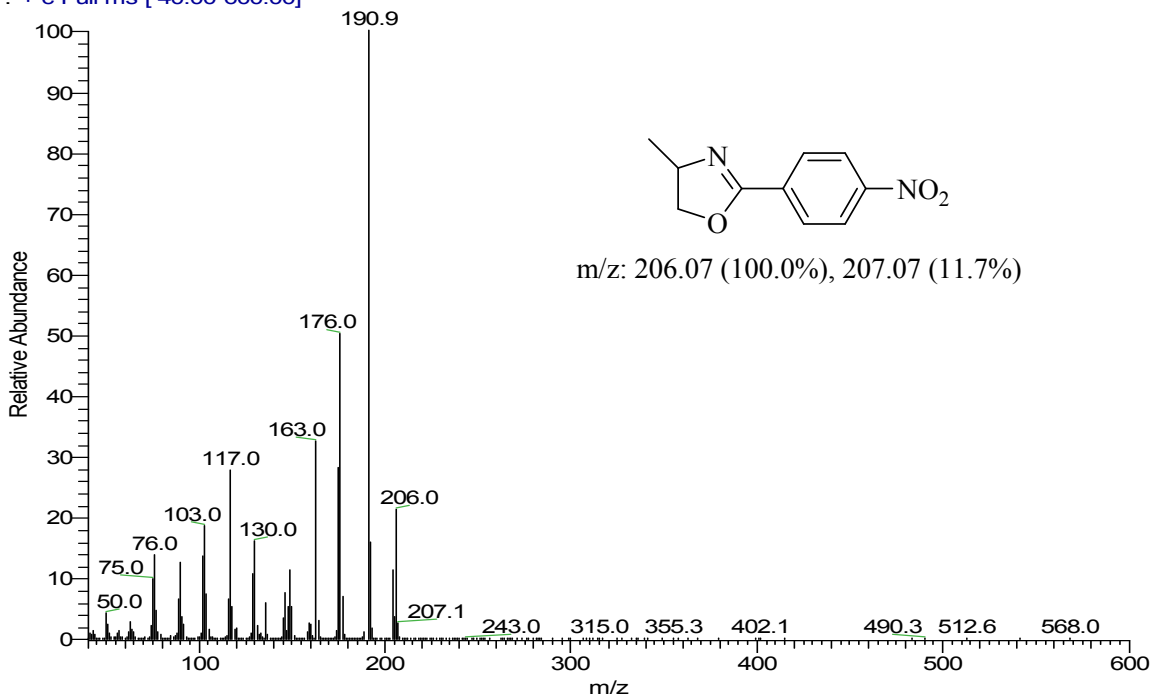

**4-methyl-2-phenyl-4,5-dihydrooxazole (3h, table 2, Entry 8) [4]**

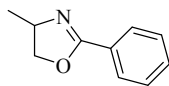

Isolated yield = 78%; <sup>1</sup>H NMR δ(300 MHz, CDCl<sub>3</sub>) 7.90 (d, J = 7.5 Hz, Ar, 2H), 7.33 – 7.44 (m, Ar, 3H), 4.47 (t, J = 9.0 Hz, 7.5 Hz, 1H), 4.30- 4.40 (m, 1H), 3.91 (t, J = 7.5 Hz, 7.5 Hz, 1H), 1.34 (d, J = 6.8 -CH<sub>3</sub>, 3H). GC-MS m/z 161.1 (M<sup>+</sup> peak), 146.0, 131.0, 103.0, 77.0.

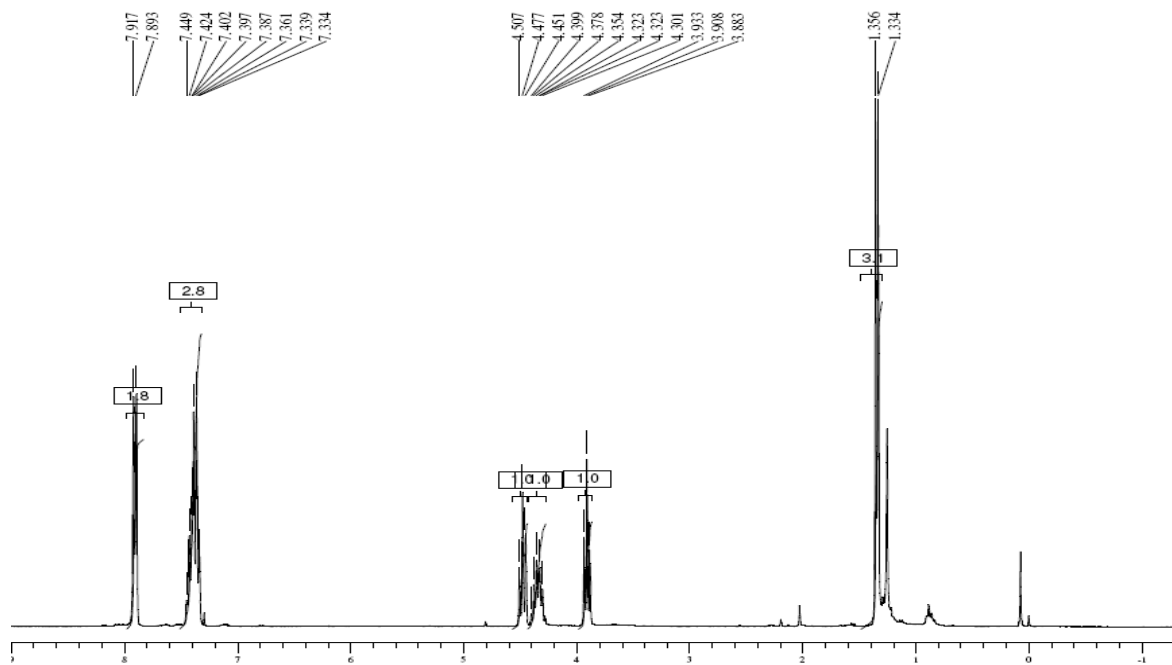

UMA-ASOX-126-8H #416 RT: 10.90 AV: 1 NL: 3.19E7  
T: + c Full ms [ 40.00-600.00]

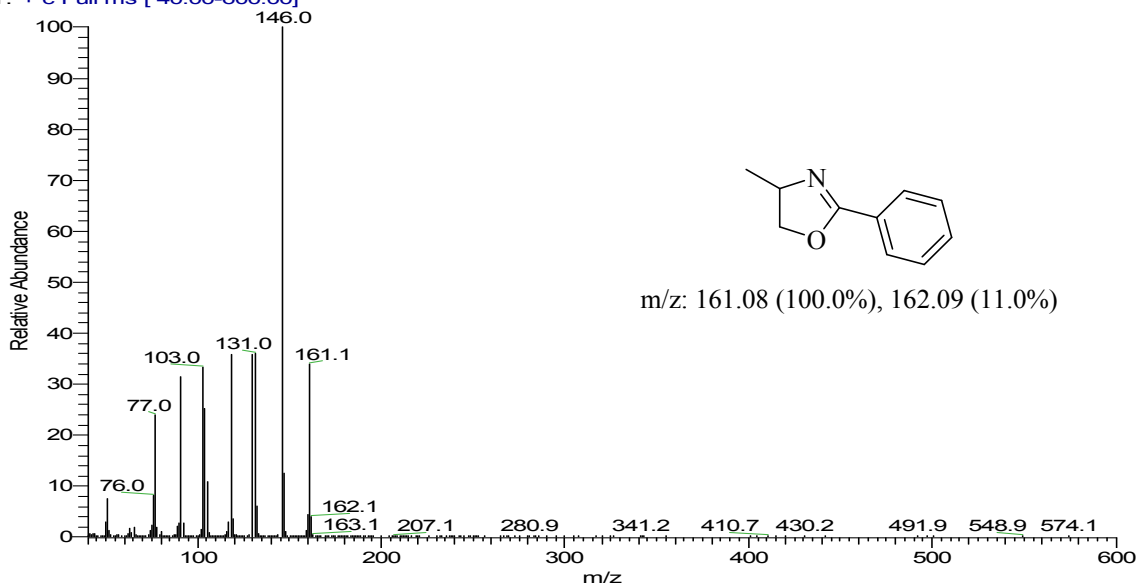

**2-(4-chlorophenyl)-4-methyl-4,5-dihydrooxazole (3i, Table 2, Entry 9)**

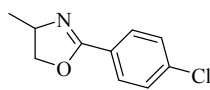

Isolated yield = 65%; yellow liquid; IR (KBr)  $\text{cm}^{-1}$ : 3064, 3030, 2966, 2924,

1720, 1648, 1491, 1451, 1356, 1269, 1170, 1060, 1021, 969, 841, 701.  $^1\text{H}$

NMR  $\delta$ (300 MHz,  $\text{CDCl}_3$ ) 7.81 (d,  $J = 8.8$  Hz, Ar, 2H), 7.32 (d,  $J = 8.1$  Hz, Ar, 2H), 4.45 (t,  $J = 8.1$  Hz, 1H), 4.26- 4.35 (m, 1H), 3.88 (t,  $J = 7.3$  Hz, 8.1 Hz, 1H), 2.42(s,  $-\text{CH}_3$ , 3H), 1.38 (d,  $J = 6.6$  Hz,  $-\text{CH}_3$ , 3H).  $^{13}\text{C}$  NMR (75 MHz,  $\text{CDCl}_3$ ): 162.6, 137.4, 129.5, 128.6, 126.3, 74.2, 62.0, 21.4.

**GC-MS**  $m/z$  195.0 ( $\text{M}^+$  peak), 180.0, 125.0, 111.0, 75.0 .

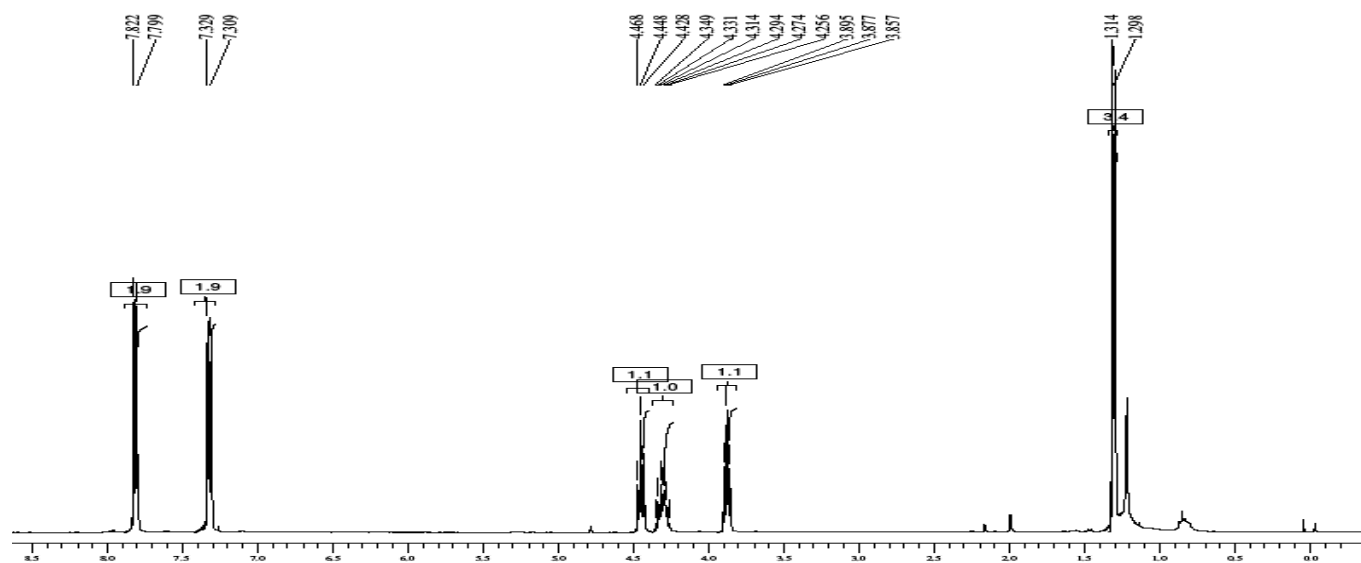

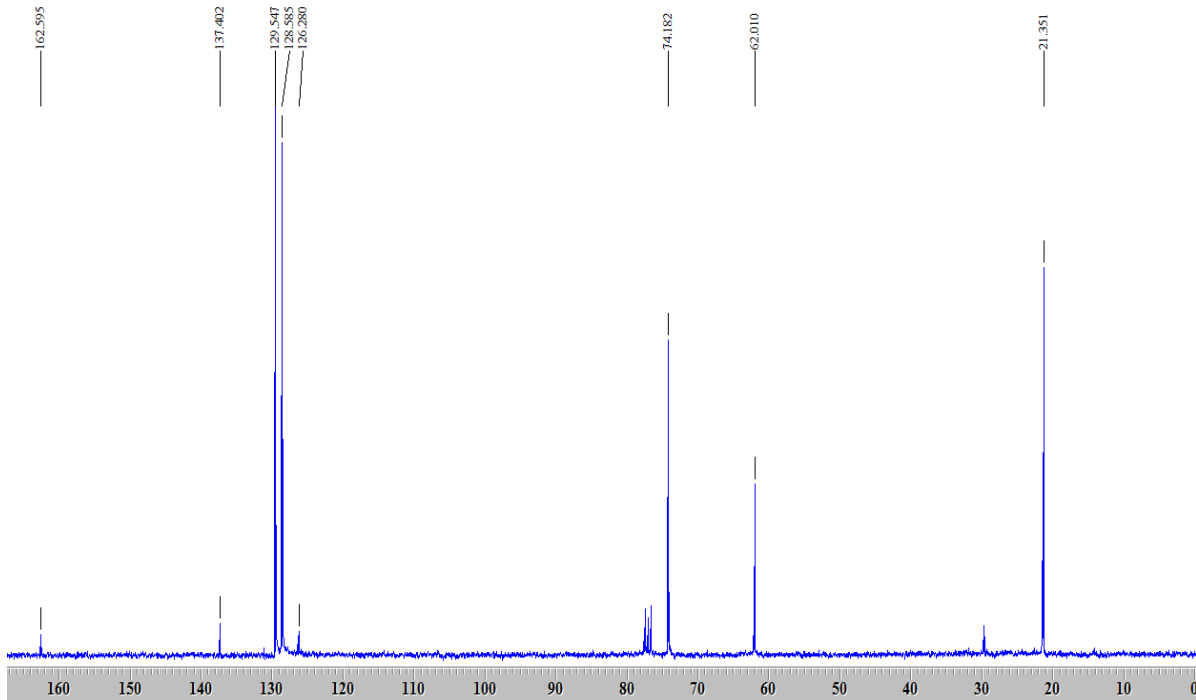

UMA-ASOX-125-6H #533 RT: 13.13 AV: 1 NL: 2.70E7  
 T: + c Full ms [ 40.00-600.00]

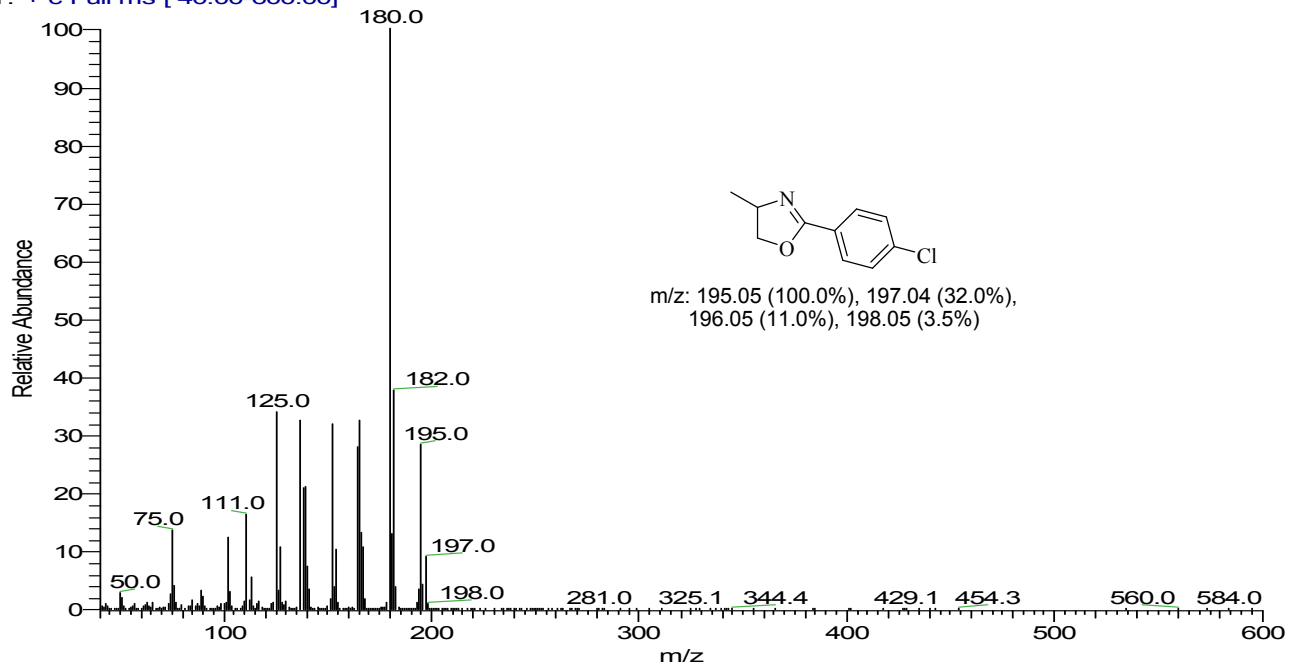



**4-methyl-2-p-tolyl-4,5-dihydrooxazole (3j, Table 2, Entry 10)**

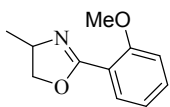

Isolated yield = 83%; pale yellow solid; IR (KBr)  $\text{cm}^{-1}$ : 2928, 2846, 1719,

1598, 1466, 1380, 1253, 1175, 1102, 1023, 936, 752;  $^1\text{H}$  NMR  $\delta$ (300

MHz,  $\text{CDCl}_3$ ) 7.95 (d,  $J = 8.1$  Hz, Ar, 1H), 7.30-7.50 (m, Ar, 1H), 6.97-7.04 (m, Ar, 1H), 5.90 (t,  $J = 9.0$  Hz, 8.1 Hz, 1H), 5.60-5.80 (m, 1H), 5.15 (t,  $J = 9.0$  Hz, 8.1 Hz, 1H), 3.95 (s,  $-\text{CH}_3$ , 3H), 2.27 (d,  $J = 5.3$ ,  $-\text{CH}_3$ , 3H).  $^{13}\text{C}$  NMR (75 MHz,  $\text{CDCl}_3$ ): 163.4, 141.4, 128.8, 128.0, 124.9, 71.8, 67.7, 28.5, 21.4. **GC-MS**  $m/z$  190.1 ( $\text{M}^+$  peak), 189.0, 160.0, 118.0, 91.0, 77.0, 63.0. .

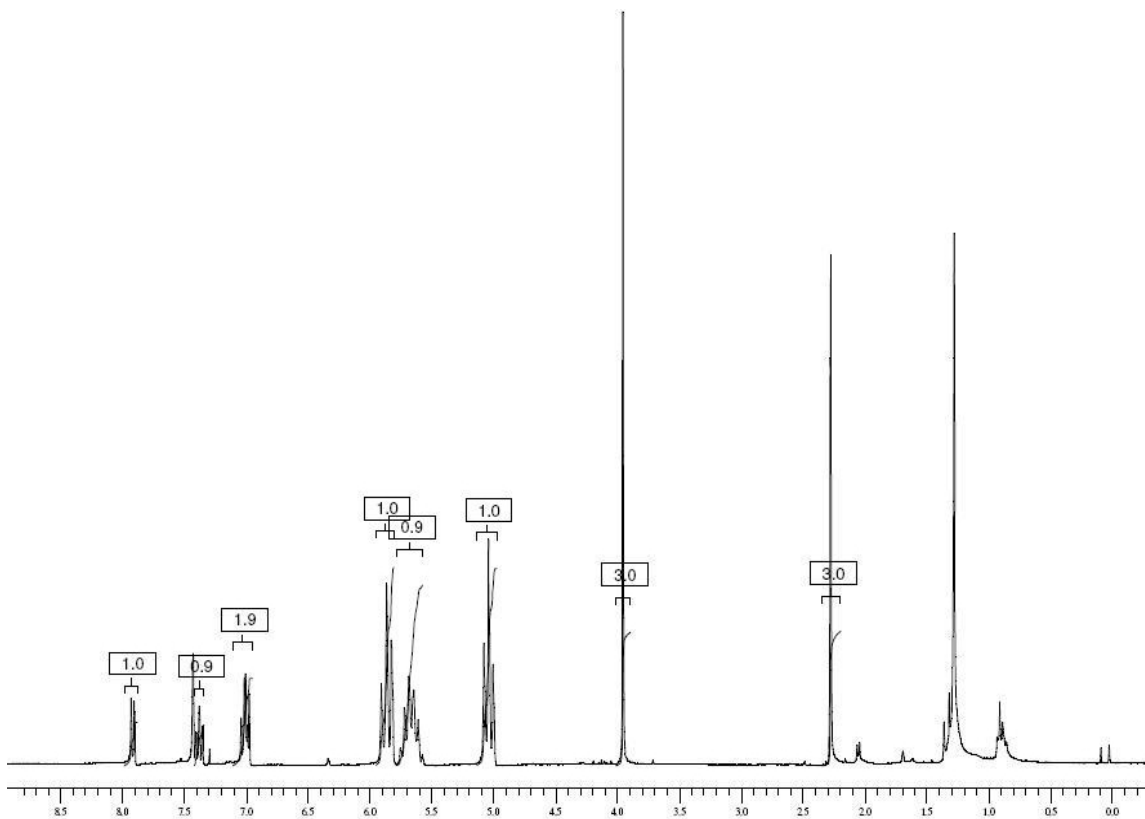

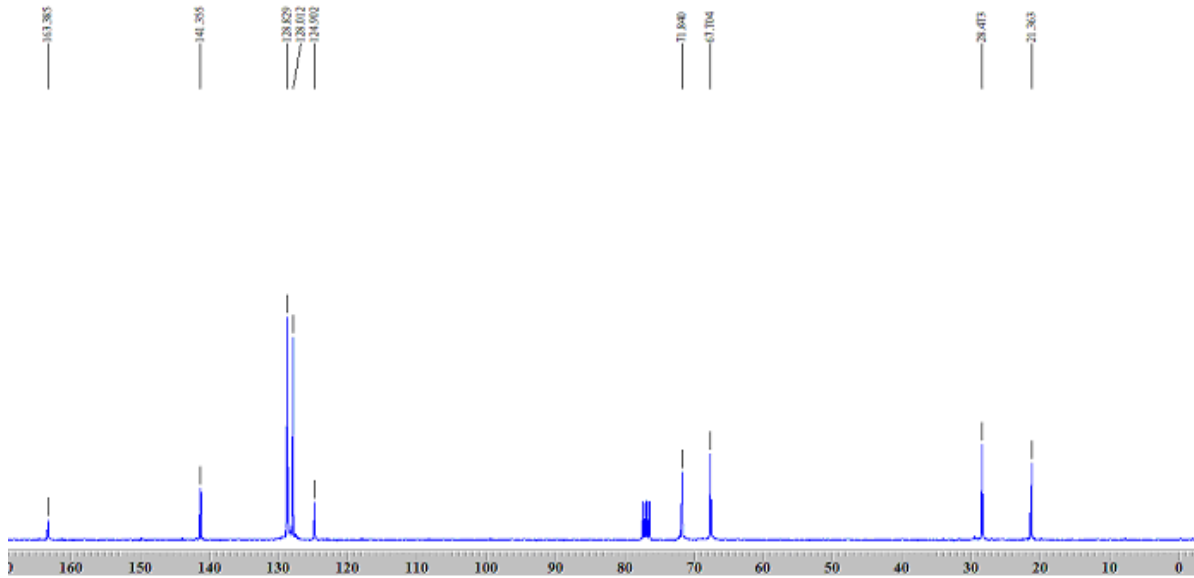

UMA-ASOX-127-8H #560 RT: 13.64 AV: 1 NL: 2.59E7  
 T: + c Full ms [ 40.00-600.00]

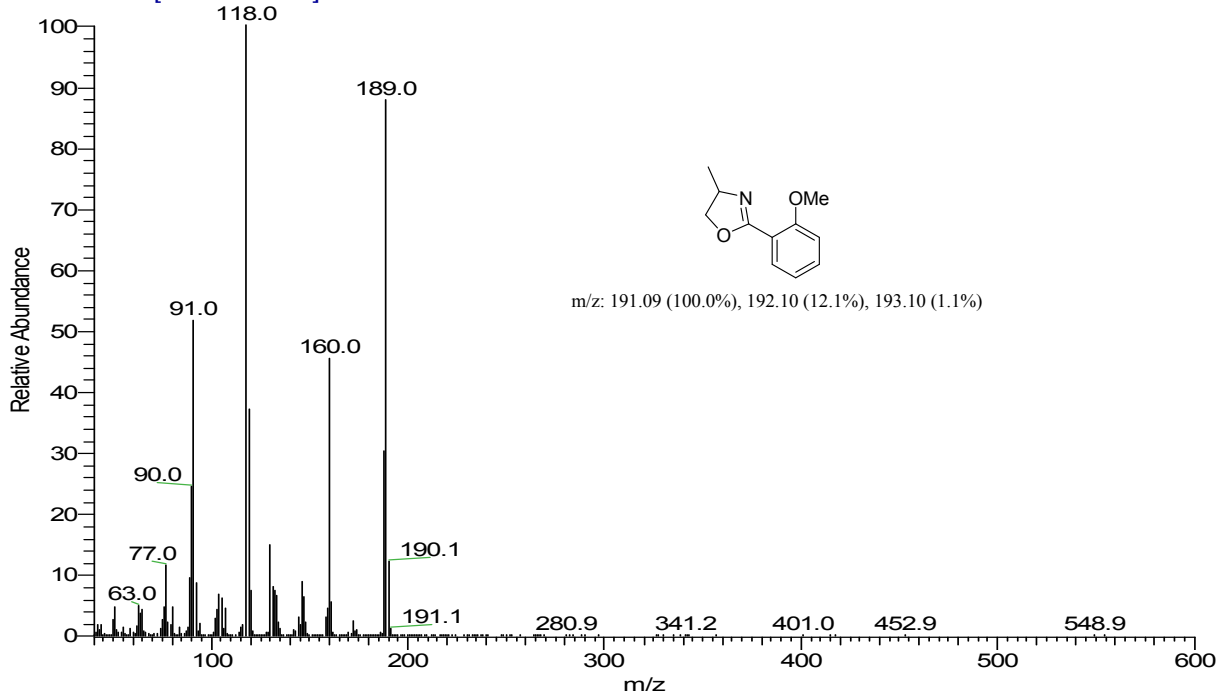

**4-ethyl-2-p-tolyl-4,5-dihydrooxazole (3k, Table 2, Entry 11)**

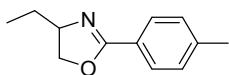

Isolated yield = 72%; yellow liquid; IR (KBr)  $\text{cm}^{-1}$ : 2963, 2897, 1648,

1512, 1461, 1355, 1178, 1065, 963, 828, 728.  $^1\text{H}$  NMR  $\delta$ (300 MHz,

$\text{CDCl}_3$ ) 7.82 (d,  $J = 8.1$  Hz, Ar, 2H), 7.20 (d,  $J = 7.9$  Hz, Ar, 2H), 4.46 (t,  $J = 7.9$  Hz, 1H), 4.17-

4.43 (m, 1H), 4.02 (t,  $J = 7.9$  Hz, 1H), 2.42 (s,  $-\text{CH}_3$ , 3H), 1.57 – 1.82 (m, 2H), 1.3 (t,  $J = 7.4$

Hz, 7.4 Hz, 3H).  $^{13}\text{C}$  NMR (75 MHz,  $\text{CDCl}_3$ ): 157.4, 137.1, 134.1, 131.7, 130.2, 120.6, 111.8,

56.1, 11.6. **GC-MS**  $m/z$  189.1 ( $\text{M}^+$  peak), 160.0, 105.1, 91.0, 65.0 .

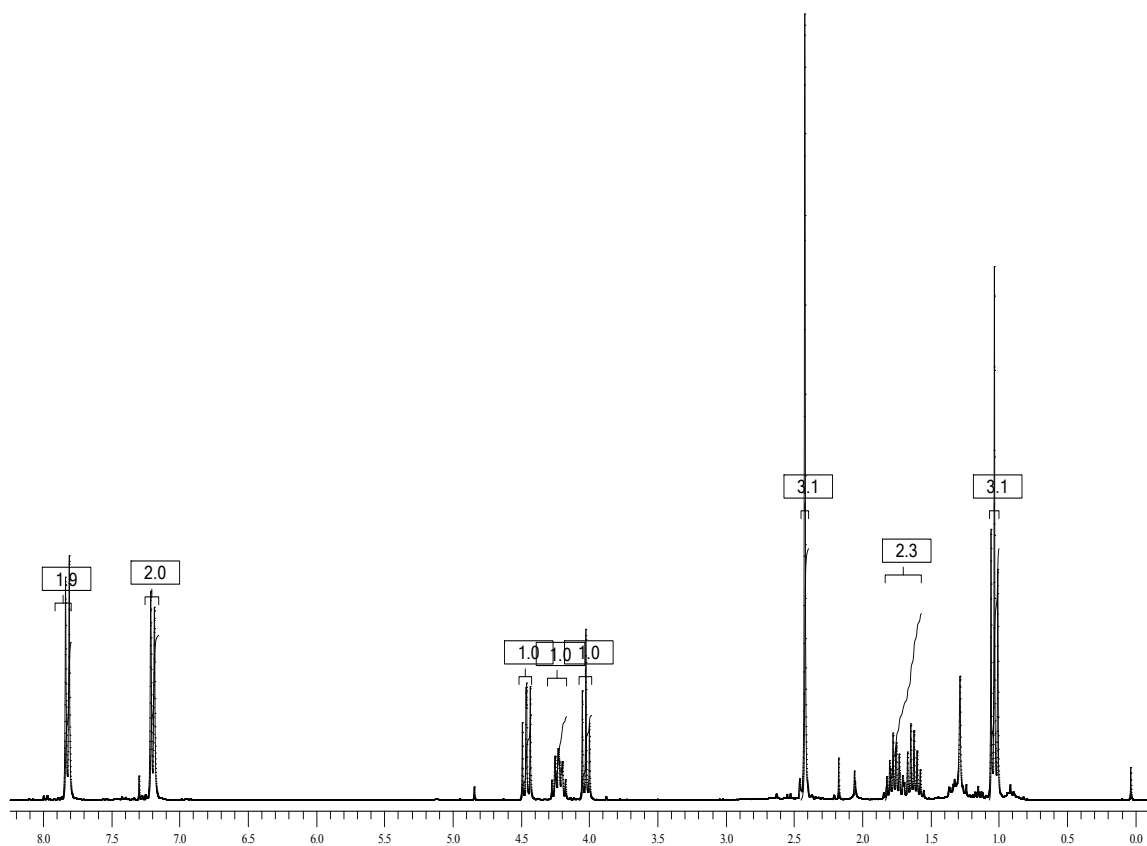

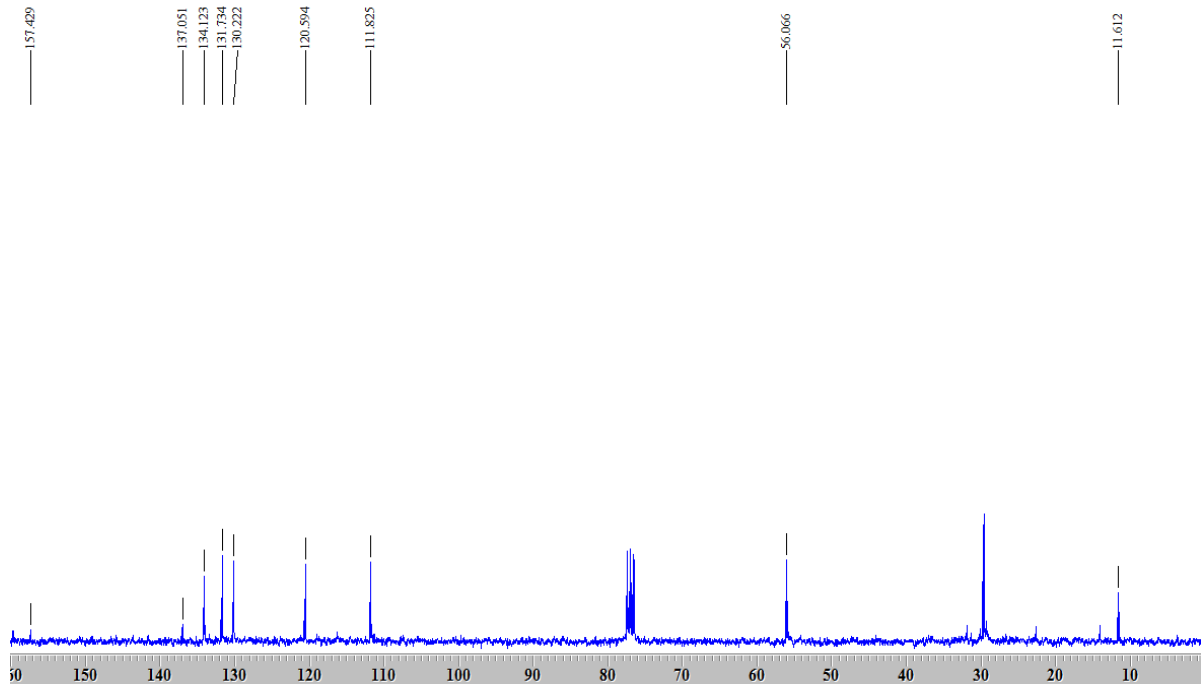

UMA-ASOX-136-10H #563 RT: 13.70 AV: 1 NL: 3.20E7  
 T: + c Full ms [ 40.00-600.00]

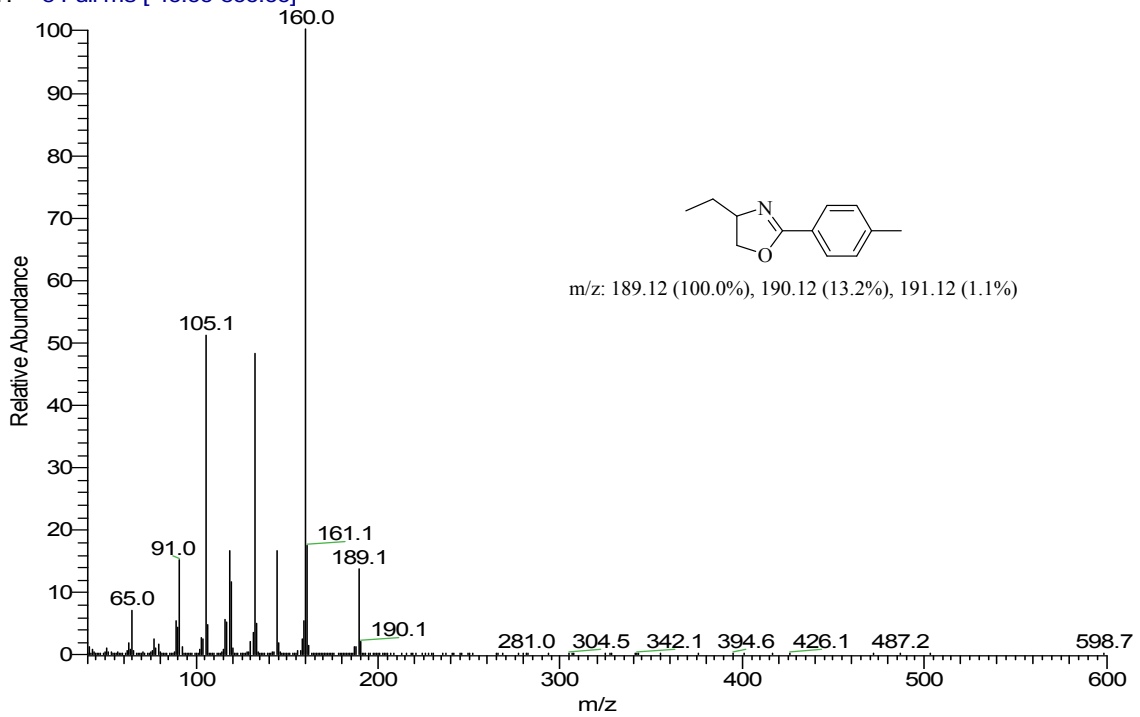

**4-ethyl-2-(4-nitrophenyl)-4,5-dihydrooxazole (3I, Table 2, Entry 12) [6]**

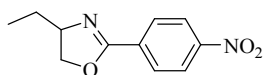

Isolated yield = 81%;  $^1\text{H NMR } \delta(300 \text{ MHz, CDCl}_3)$  8.28 (d,  $J = 8.8 \text{ Hz}$ , Ar, 2H), 8.12 (d,  $J = 8.8 \text{ Hz}$ , Ar, 2H), 4.54 (t,  $J = 8.1 \text{ Hz}$ , 1H), 4.24- 4.34

(m, 1H), 4.10 (t,  $J = 7.9 \text{ Hz}$ , 1H), 1.61 – 1.86 (m, 2H), 1.06 (d,  $J = 7.4 \text{ Hz}$ , 3H). **GC-MS**  $m/z$  220 ( $\text{M}^+$  peak), 191.0, 163.0, 146.0, 117.0, 90.0, 76.0 .

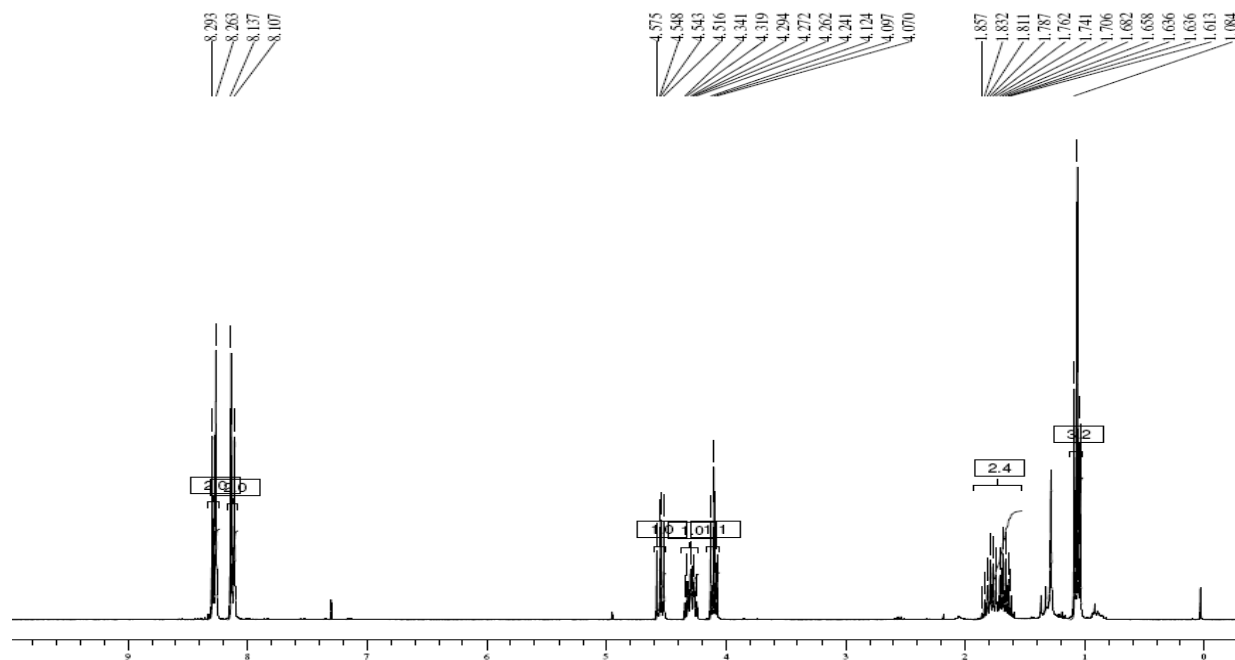

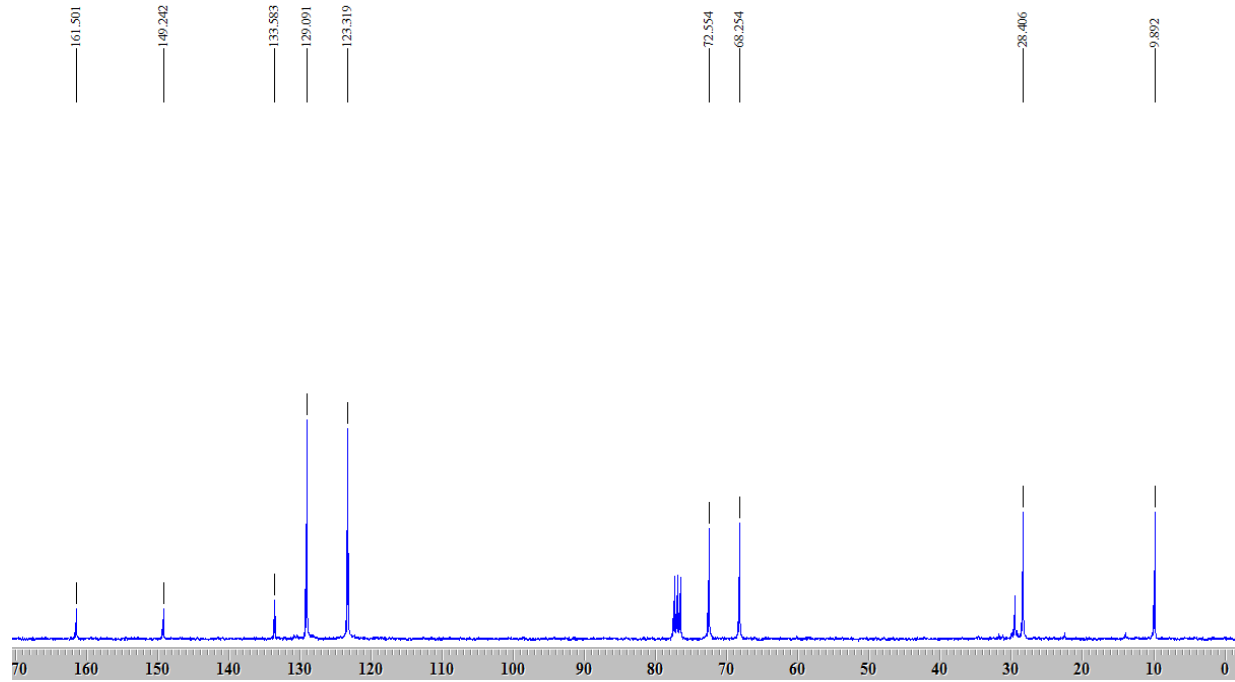

UMA-ASOX-132-5H #731 RT: 16.90 AV: 1 NL: 3.51E7  
 T: + c Full ms [ 40.00-600.00]

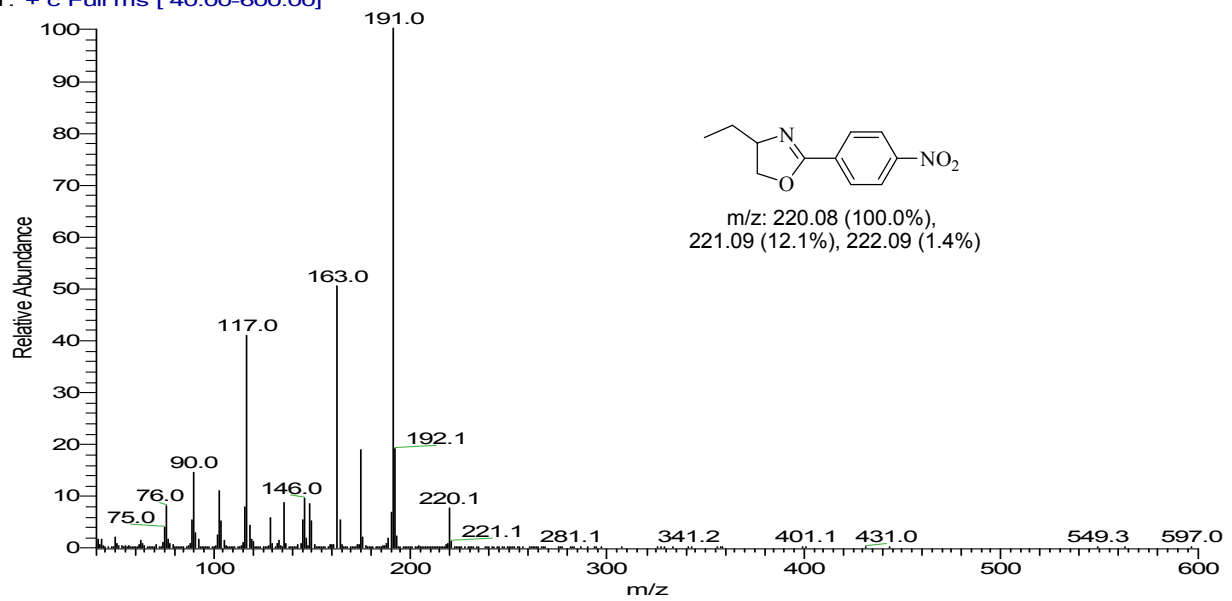

**2-(4-chlorophenyl)-4-ethyl-4,5-dihydrooxazole (3m, Table 2, Entry 13) [7]**

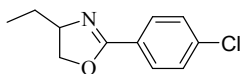

Isolated yield =83%;  $^1\text{H NMR}$   $\delta$ (300 MHz,  $\text{CDCl}_3$ ) 7.80 (d,  $J = 8.6$  Hz, Ar, 2H), 7.32 (d,  $J = 8.6$  Hz, Ar, 2H), 4.46 (t,  $J = 8.1$  Hz, 1H), 4.21- 4.30 (m, 1H), 3.96 (t,  $J = 7.9$  Hz, 1H), 1.72 – 1.80 (m, 2H), 1.04 (d,  $J = 7.7$  Hz, 7.6 Hz, 3H). **GC-MS**  $m/z$  209.1 ( $\text{M}^+$  peak), 182.0,179.9, 125.0, 111.0, 75.0.

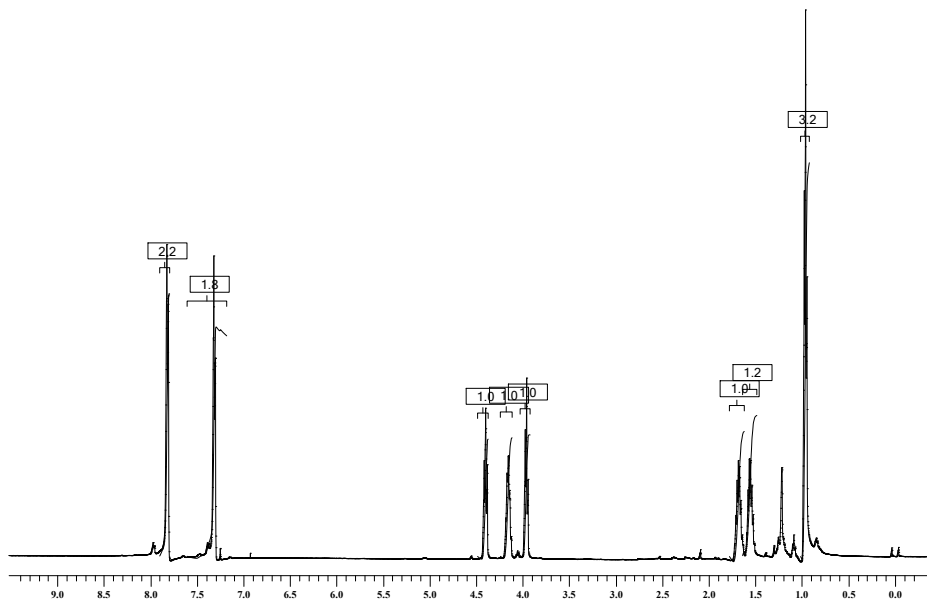

UMA-ASOX-140-1D #599 RT: 14.39 AV: 1 NL: 4.09E7  
T: + c Full ms [ 40.00-600.00]

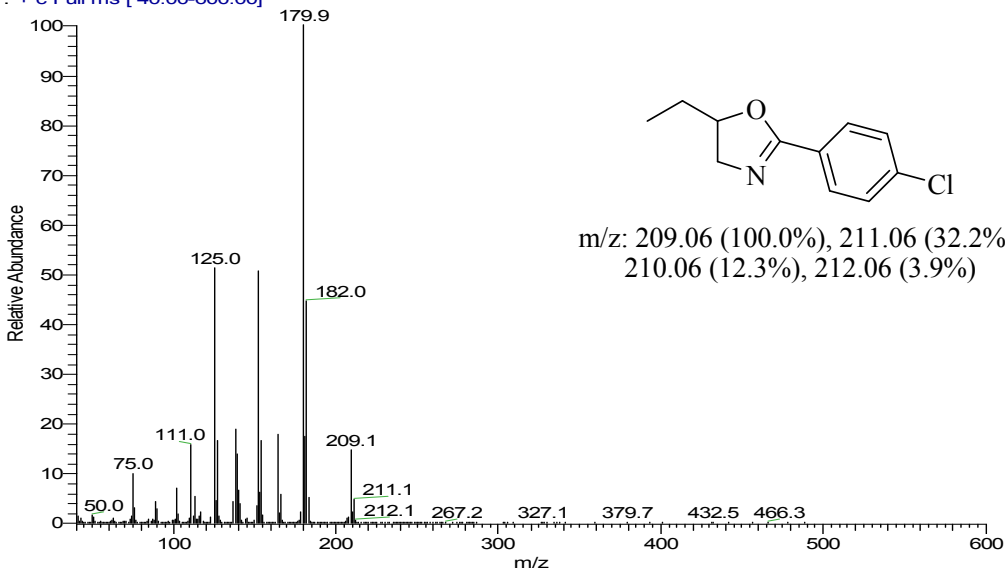

**4-ethyl-2-phenyl-4,5-dihydrooxazole (3n, Table 2, Entry 14) [5]**

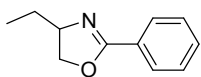

Isolated yield = 84%;  $^1\text{H NMR}$   $\delta$ (300 MHz,  $\text{CDCl}_3$ ) 7.82 (d,  $J = 8.1$  Hz, Ar, 2H), 7.32 (d,  $J = 7.9$  Hz, 1H), 7.20 (d,  $J = 7.9$  Hz, Ar, 2H), 4.50 (t,  $J = 7.9$  Hz, 1H), 4.27- 4.48 (m, 1H), 4.03 (t,  $J = 7.9$  Hz, 1H), 1.62 – 1.91 (m, 2H), 1.0 (t,  $J = 7.4$  Hz, 3H). **GC-MS**  $m/z$  175.0 ( $\text{M}^+$  peak), 146.0, 118.0, 91.0, 77.0.

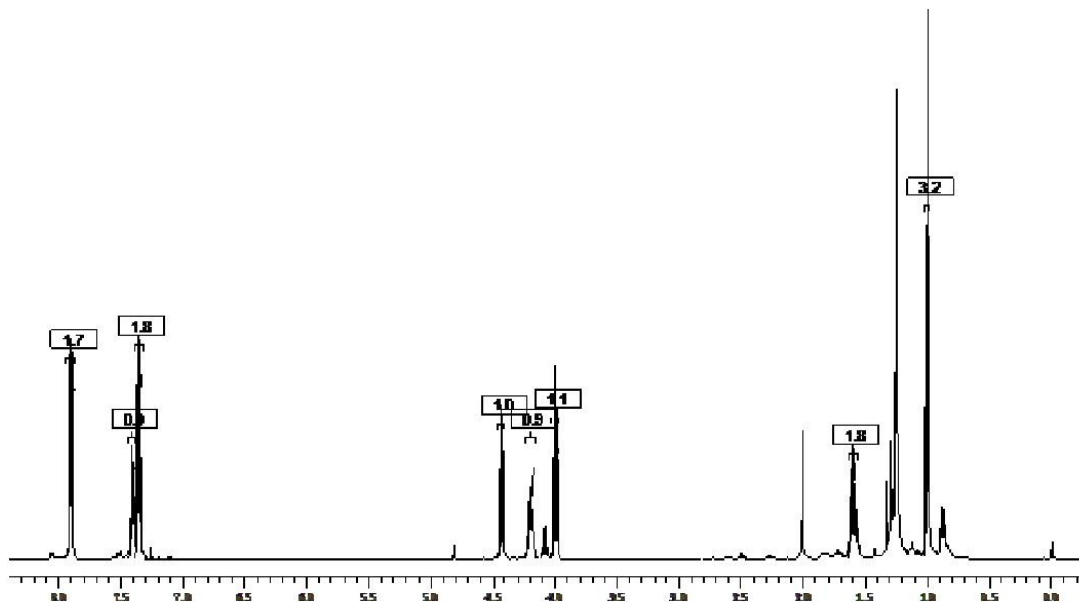

UMA-ASOX-130-8H #482 RT: 12.16 AV: 1 NL: 4.60E6  
T: + c Full ms [ 40.00-600.00]

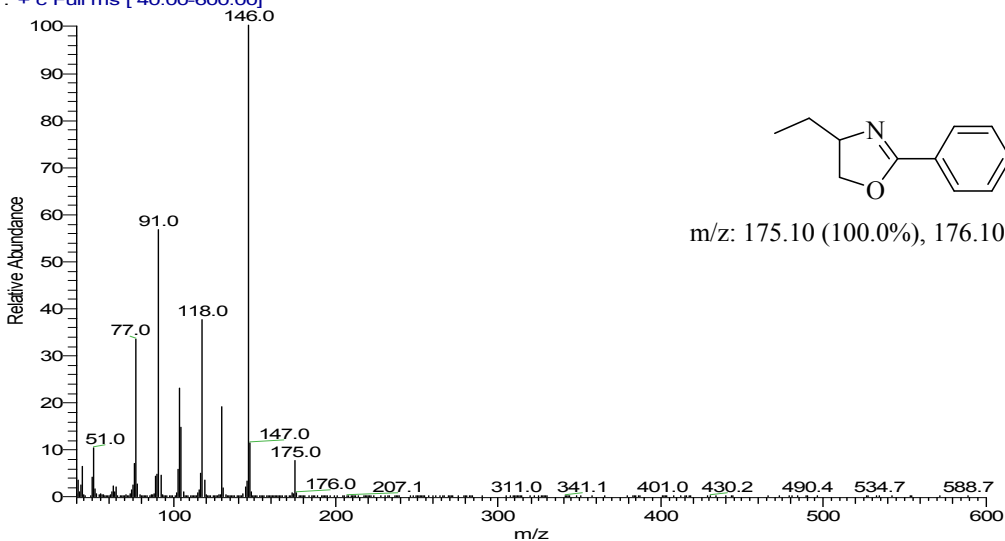



**4-ethyl-2-(pyridin-3-yl)-4,5-dihydrooxazole (3o, Table 2, Entry15)**

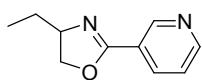

Isolated yield = 74%; yellow liquid; IR (KBr)  $\text{cm}^{-1}$ : 2962, 2926, 2875,

1728, 1653, 1571, 1529, 1416, 1359, 1260, 1077, 1022, 947, 797.  $^1\text{H}$  NMR

$\delta$ (300 MHz,  $\text{CDCl}_3$ ) 9.02(s, Ar, 1H), 8.58 (d,  $J = 8.1$  Hz, Ar, 1H), 8.11 (d,  $J = 8.1$  Hz, 1H), 7.22

– 7.27 (m, Ar, 1H), 4.37 (t,  $J = 8.1$  Hz, 1H), 4.17- 4.43 (m, 1H), 4.09 – 4.20 (m, 1H), 3.93 – 3.99

(m, 1H), 1.48 – 1.71 (m, 2H), 0.91 -0.96 (m, 3H).  $^{13}\text{C}$  NMR (75 MHz,  $\text{CDCl}_3$ ): 161.4, 151.8,

149.4, 135.5, 123.9, 123.1, 72.3, 67.9, 28.5, 9.9. **GC-MS**  $m/z$  176.1 ( $\text{M}^+$  peak ), 147.0, 119.0,

92.0, 78.0.

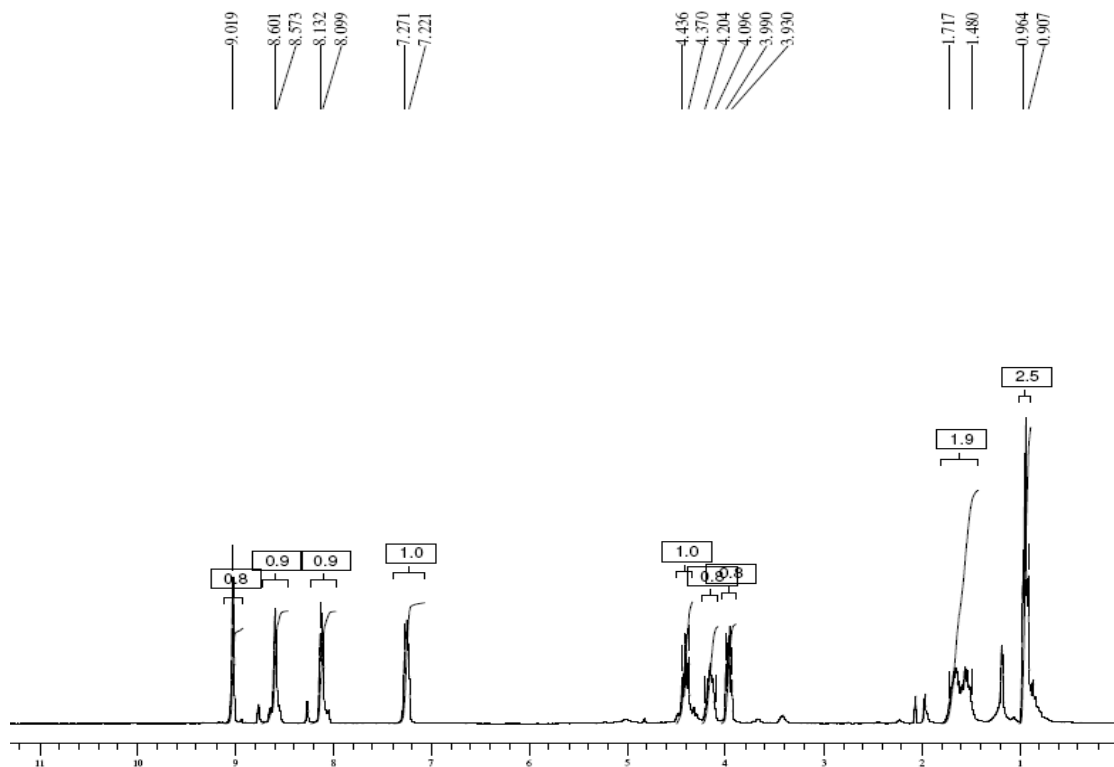

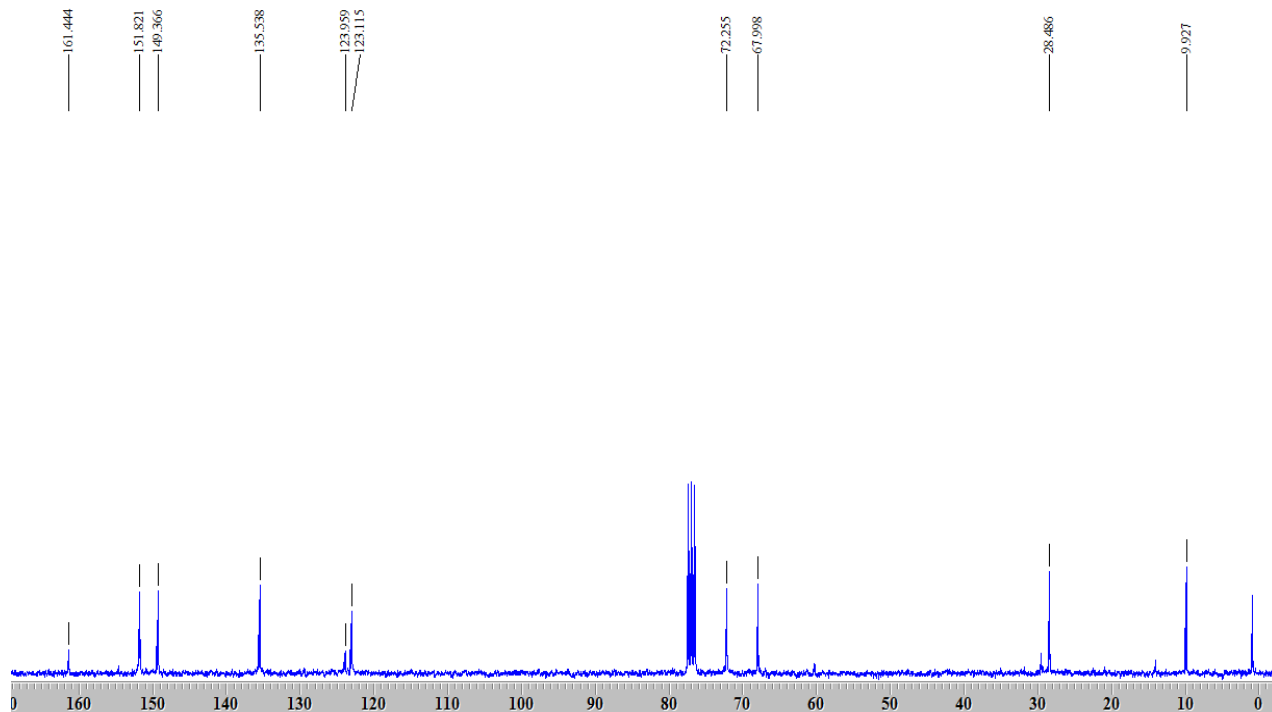

UMA-ASOX-138-4H #524 RT: 12.96 AV: 1 NL: 3.32E7  
 T: + c Full ms [ 40.00-600.00]

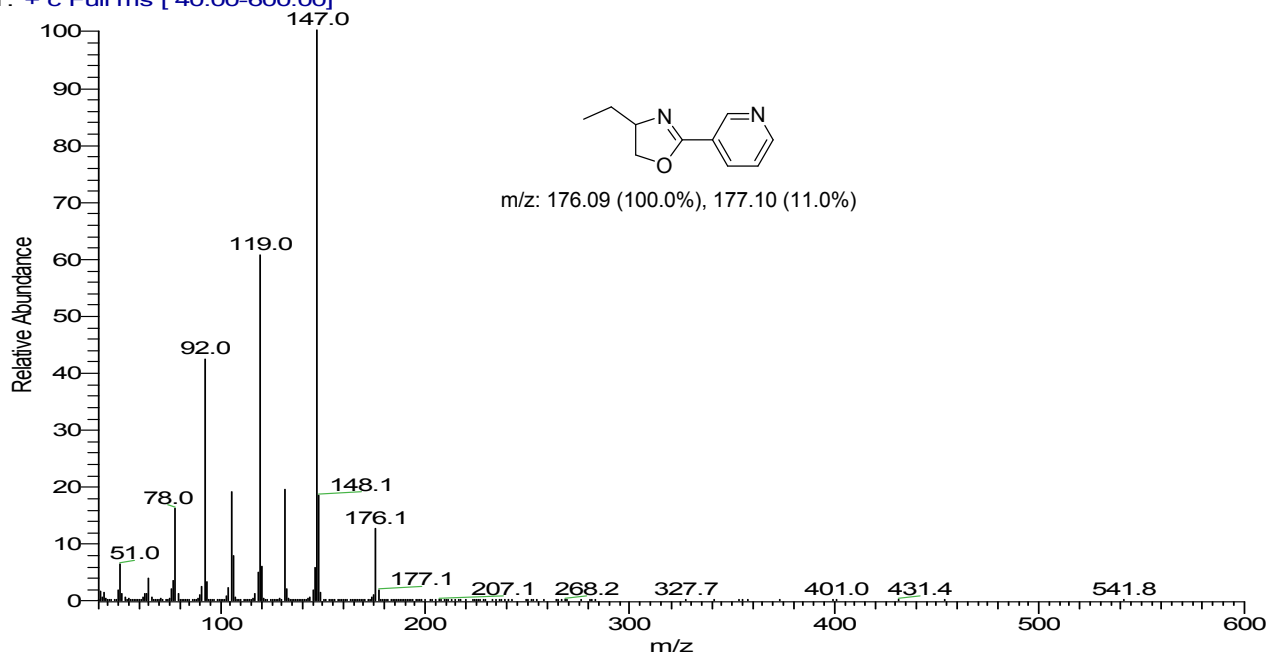

**(S)-4-isopropyl-2-phenyl-4,5-dihydrooxazole (3p, Table 3, Entry 1) [6]**

Isolated yield = 81%;  $^1\text{H NMR } \delta(300 \text{ MHz, CDCl}_3)$  7.91 (d,  $J = 8.1 \text{ Hz, Ar, 2H}$ ), 7.34-7.44 (m, Ar, 3H), 4.34-4.41 (m, -CH, 1H), 4.04- 4.12 (m, -CH<sub>2</sub>, 2H), 1.79-1.88 (m, -CH, 1H), 1.02 (d,  $J = 7.3 \text{ Hz, -CH}_3$ , 3H), 0.93 (d,  $J = 7.3 \text{ Hz, -CH}_3$ , 3H). **GC-MS**  $m/z$  189.1, 146.0, 118.0, 91.0, 77.0, 51.0. Optical rotation:  $[\alpha]_{\text{D}}^{22} = -76.4$ , ( $c = 0.63$  in  $\text{CHCl}_3$ ) {Lit.<sup>5</sup>  $[\alpha]_{\text{D}}^{22} -83$  ( $c = 0.63$ ,  $\text{CHCl}_3$ )}

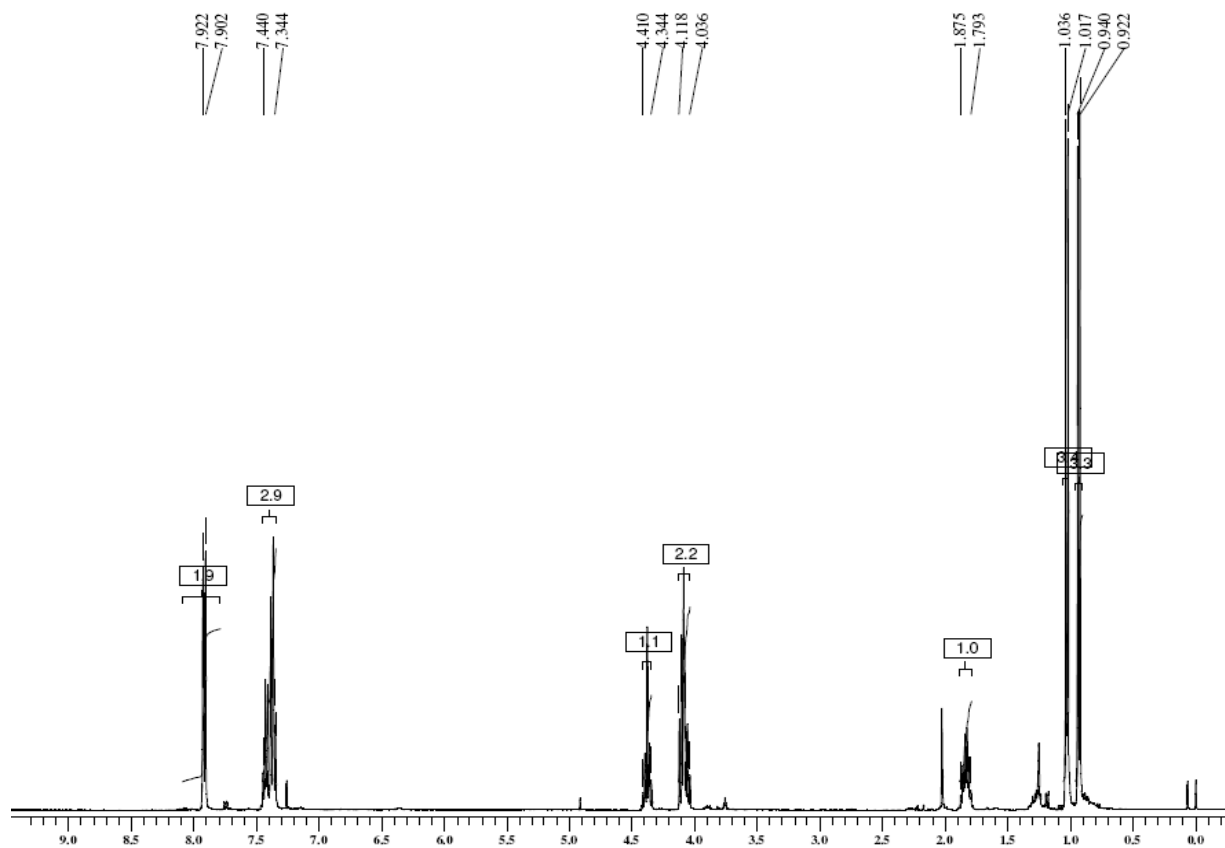

UMA-ASOX-115-20H #523 RT: 12.94 AV: 1 NL: 3.75E7  
T: + c Full ms [ 40.00-600.00]

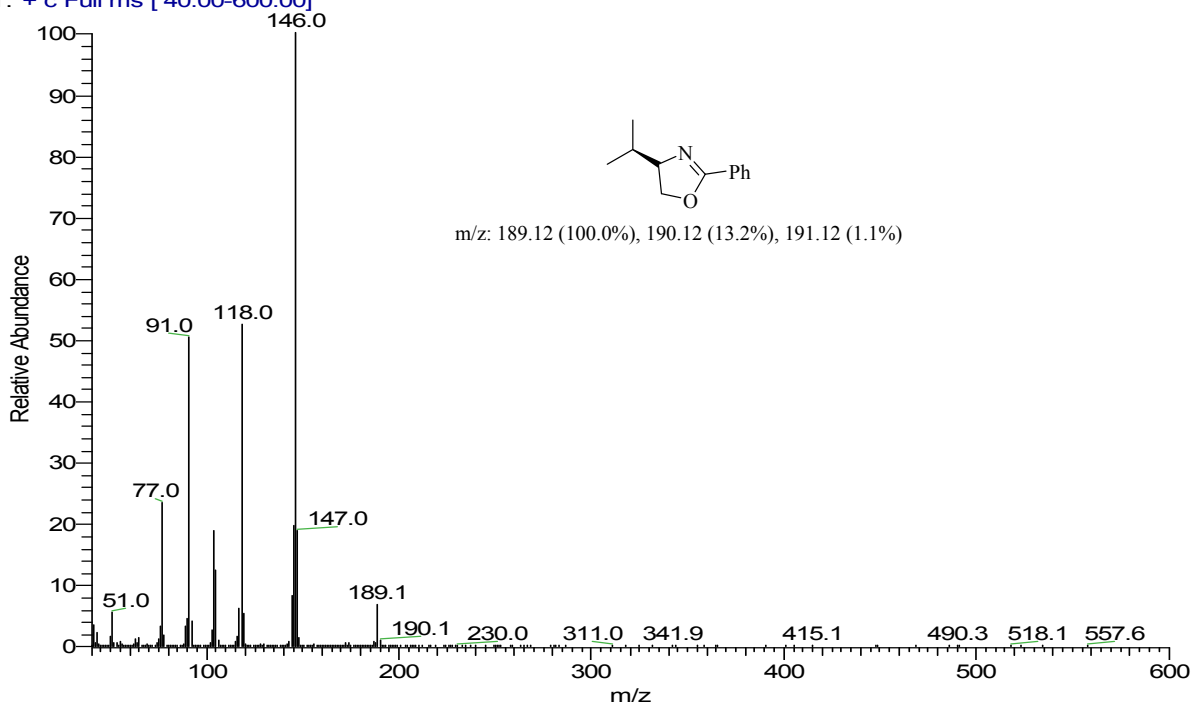

**(S)-4-isobutyl-2-phenyl-4,5-dihydrooxazole (3q, Table 3, Entry 2) [8]**

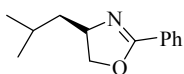

Isolated yield = 86%;  $^1\text{H NMR}$   $\delta$ (300 MHz,  $\text{CDCl}_3$ ) 7.89 (d,  $J = 8.3$  Hz, Ar, 2H), 7.33- 7.45 (m, Ar, 3H), 4.47 (t,  $J = 9.8$ Hz, 7.5 Hz, 1H), 4.25- 4.36 (m, H), 3.95 (t, 7.5 Hz, 1H), 1.78 - 1.91 (m, 1H), 1.64 – 1.74 (m, 1H), 1.31 – 1.40 (m, 1H), 0.97 - 1.00 (m,  $-(\text{CH}_3)_2$ , 6H). **GC-MS**  $m/z$  204.1 (M+1), 174.0, 145.1, 132.1, 131.0, 91.0, 77.0. Optical rotation:  $[\alpha] = -66.1$ ,  $c = 1.0$  in  $\text{CHCl}_3$ . {Lit.<sup>7</sup>  $[\alpha]_{\text{D}}^{21} = -76.9$  ( $c = 1$ ,  $\text{CHCl}_3$ )}

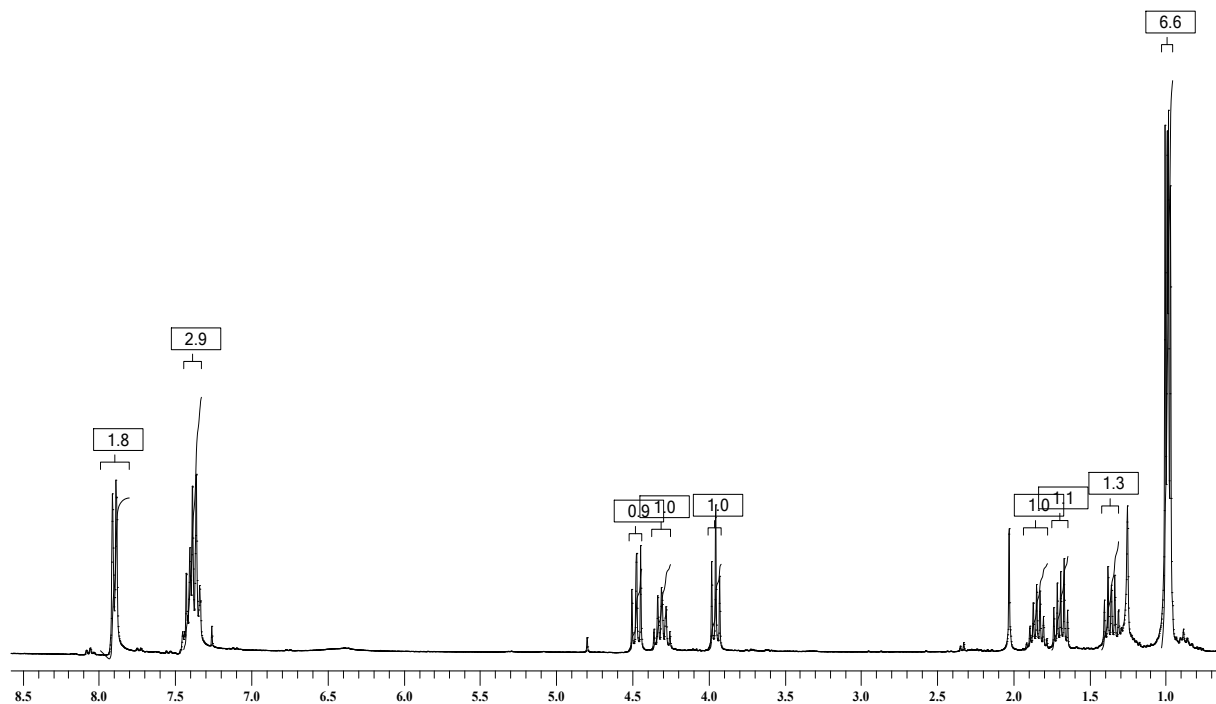

UMA-AOX-110-6H #610 RT: 14.59 AV: 1 NL: 4.00E7  
 T: + c Full ms [ 40.00-600.00]

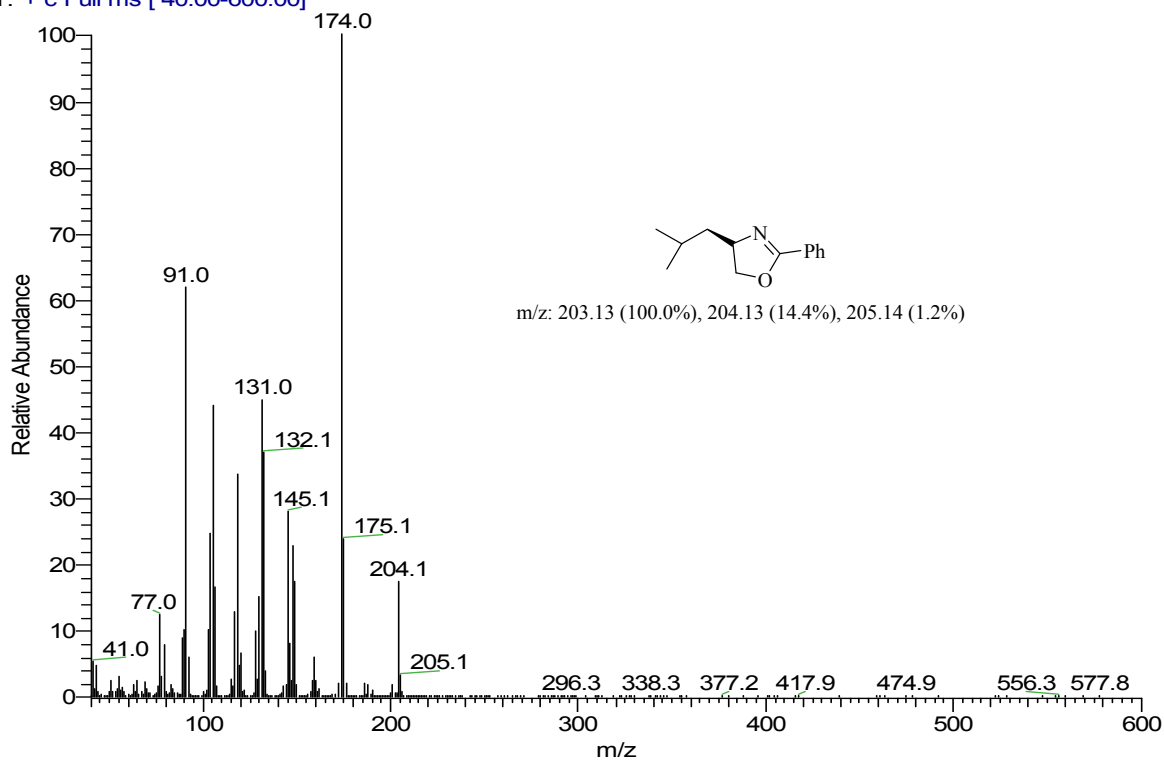

**(R)-4-isobutyl-2-phenyl-4,5-dihydrooxazole (3r, Table 3, Entry 3) [8]**

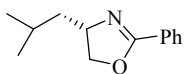

Optical rotation:  $[\alpha] = +71.5$ ,  $c = 1.0$  in  $\text{CHCl}_3$ . {Lit. [8]  $[\alpha]_{\text{D}}^{21} = -76.9$  for

(S)-4-isobutyl-2-phenyl-4,5-dihydrooxazole ( $c = 1.0$ ,  $\text{CHCl}_3$ )}

**(R)-5-methyl-2-phenyl-4,5-dihydrooxazole (3s, Table 3, Entry 4) [9]**

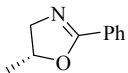

Optical rotation:  $[\alpha] = -4.5$ ,  $c = 1.0$  in  $\text{MeOH}$ . {Lit. [9]  $[\alpha]_{\text{D}}^{25} = -5.1$  ( $c = 1.0$ ,

$\text{MeOH}$ )}

**(S)-4-methyl-2-phenyl-4,5-dihydrooxazole (3t, Table 3, Entry 5) [9]**

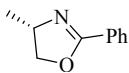

Optical rotation:  $[\alpha] = -74.2$ ,  $c = 1.0$  in  $\text{EtOH}$ . {Lit.[9]  $[\alpha]_{\text{D}}^{25} = -79.8$  ( $c = 1.0$ ,

$\text{EtOH}$ )}

## References:

1. Salomon, *Chem. Ber.*, **1893**, *26*, 1322.
2. Semenov, V. P., *J. Org. Chem. USSR, (English ed.)*, **1977**, *13*, 2056.
3. Chamchaang, W.; Pinhas, A. R. *J. Org. Chem.* **1990**, *55*, 2943-2950.
4. Alvernhe, G. M.; Ennakoua, C. M.; Lacombe, S. M.; Laurent, A. J. *J. Org. Chem.* **1981**, *24*, 4938.
5. Byrne, C. M.; Church, T. L.; Kramer, J. W.; Coates, G. W. *Angew. Chem. Int. Ed.* **2008**, *47*, 3979–3983.
6. Schwekendiek, K.; Glorius, F. *Synthesis*, **2006**, 2996.
7. Cwik, A.; Hell, Z.; Hegedus, A.; Finta, Z.; Horvath, Z. *Tetrahedron Lett.* **2002**, *43*, 3985.
8. Fukuhara, T.; Hasegawa, C.; Hara, S. *Synthesis*, **2007**, 1528.
9. Dehmlow, E. V.; Pieper, St.; Neumann, B.; Stammler, H.-G. *Liebigs Ann. Chem.* **1997**, 1013.
